# Supplementary material
Source: MDPI journal article supplement (https://www.mdpi.com/2073-4395/14/1/85)
Supplement: s1 [file s1]

## SUPPLEMENT

Table S1. ANOVA table for total tuber yield

| Tukey's studentized range (HSD) test for data1                                                                          |          |    |          |  |  |
|-------------------------------------------------------------------------------------------------------------------------|----------|----|----------|--|--|
| Data1= Total Yield                                                                                                      |          |    |          |  |  |
| Alpha                                                                                                                   | 0,05     |    |          |  |  |
| Degrees of freedom of error                                                                                             | 96       |    |          |  |  |
| Mean square error                                                                                                       | 28,33499 |    |          |  |  |
| Critical value of the studentized range                                                                                 | 2,80719  |    |          |  |  |
| The difference is minimally significant                                                                                 | 1,761    |    |          |  |  |
| Medium with the same letter do not differ significantly                                                                 |          |    |          |  |  |
| Grouping Tukey                                                                                                          | Mean     | N  | Cultivar |  |  |
| A                                                                                                                       | 31,2808  | 72 | fianna   |  |  |
|                                                                                                                         |          |    |          |  |  |
| B                                                                                                                       | 29,1061  | 72 | irga     |  |  |
| Linear models<br>GLM procedure                                                                                          |          |    |          |  |  |
| Tukey's studentized range (HSD) test for data1                                                                          |          |    |          |  |  |
| Data1= yield                                                                                                            |          |    |          |  |  |
| Note: This test checks the Type I error of the experimental group, but generally has a higher Type II error than REGWQ. |          |    |          |  |  |
| Alpha                                                                                                                   | 0,05     |    |          |  |  |
| Degrees of freedom of error                                                                                             | 96       |    |          |  |  |
| Mean square error                                                                                                       | 28,33499 |    |          |  |  |
| Critical value of the studentized range                                                                                 | 4,3824   |    |          |  |  |
| The difference is minimally significant                                                                                 | 5,4984   |    |          |  |  |
| Medium with the same letter do not differ significantly                                                                 |          |    |          |  |  |
| Grouping Tukey                                                                                                          | Mean     | N  | Care     |  |  |

|               |          |        |       |             |  |
|---------------|----------|--------|-------|-------------|--|
|               | A        | 33,849 | 18    | p3          |  |
|               | A        |        |       |             |  |
| B             | A        | 32,059 | 18    | p4          |  |
| B             | A        |        |       |             |  |
| B             | A        | 31,863 | 18    | p8          |  |
| B             | A        |        |       |             |  |
| B             | A        | 31,684 | 18    | p7          |  |
| B             | A        |        |       |             |  |
| B             | A        | 30,843 | 18    | p2          |  |
| B             | A        |        |       |             |  |
| B             | A        | 30,512 | 18    | p6          |  |
| B             |          |        |       |             |  |
| B             |          | 28,201 | 18    | p5          |  |
|               |          |        |       |             |  |
|               | C        | 22,536 | 18    | p1          |  |
| Linear models |          |        |       |             |  |
| GLM procedure |          |        |       |             |  |
| Data 1= yield |          |        |       |             |  |
| Level         | Level    | N      | Data1 |             |  |
| Years         | Cultivar |        | Mean  | Stand. Dev. |  |
| 2007          | fianna   | 24     | 20,38 | 4,07        |  |
| 2007          | irga     | 24     | 22,21 | 6,31        |  |
| 2008          | fianna   | 24     | 34,02 | 6,98        |  |
| 2008          | irga     | 24     | 35,59 | 9,59        |  |
| 2009          | fianna   | 24     | 39,44 | 4,92        |  |
| 2009          | irga     | 24     | 29,53 | 3,47        |  |
| Level         | Level    | N      | Data1 |             |  |
| Years         | Care     |        | Mean  | Stand. Dev. |  |
| 2007          | p1       | 6      | 12,02 | 3,25        |  |

|          |       |    |   |       |       |  |
|----------|-------|----|---|-------|-------|--|
|          | 2007  | p2 | 6 | 22,45 | 2,13  |  |
|          | 2007  | p3 | 6 | 19,92 | 5,11  |  |
|          | 2007  | p4 | 6 | 21,85 | 4,90  |  |
|          | 2007  | p5 | 6 | 21,02 | 3,10  |  |
|          | 2007  | p6 | 6 | 24,13 | 4,62  |  |
|          | 2007  | p7 | 6 | 24,41 | 4,12  |  |
|          | 2007  | p8 | 6 | 24,54 | 3,52  |  |
|          | 2008  | p1 | 6 | 25,32 | 6,50  |  |
|          | 2008  | p2 | 6 | 36,11 | 8,74  |  |
|          | 2008  | p3 | 6 | 42,59 | 6,53  |  |
|          | 2008  | p4 | 6 | 38,46 | 8,86  |  |
|          | 2008  | p5 | 6 | 30,18 | 6,60  |  |
|          | 2008  | p6 | 6 | 32,21 | 9,03  |  |
|          | 2008  | p7 | 6 | 36,78 | 4,03  |  |
|          | 2008  | p8 | 6 | 36,78 | 5,48  |  |
|          | 2009  | p1 | 6 | 30,27 | 8,60  |  |
|          | 2009  | p2 | 6 | 33,97 | 9,19  |  |
|          | 2009  | p3 | 6 | 39,03 | 6,62  |  |
|          | 2009  | p4 | 6 | 35,87 | 5,42  |  |
|          | 2009  | p5 | 6 | 33,40 | 7,99  |  |
|          | 2009  | p6 | 6 | 35,20 | 5,11  |  |
|          | 2009  | p7 | 6 | 33,87 | 3,16  |  |
|          | 2009  | p8 | 6 | 34,27 | 4,48  |  |
| Level    | Level |    | N | Data1 |       |  |
| Cultivar | Care  |    |   | Mean  | Mean  |  |
| fianna   | p1    |    | 9 | 24,92 | 11,62 |  |
| fianna   | p2    |    | 9 | 34,00 | 9,97  |  |
| fianna   | p3    |    | 9 | 35,80 | 11,70 |  |
| fianna   | p4    |    | 9 | 32,98 | 8,59  |  |

|        |          |       |       |       |             |
|--------|----------|-------|-------|-------|-------------|
| fianna | p5       | 9     | 29,50 | 9,21  |             |
| fianna | p6       | 9     | 29,91 | 8,99  |             |
| fianna | p7       | 9     | 31,26 | 7,79  |             |
| fianna | p8       | 9     | 31,89 | 8,88  |             |
| irga   | p1       | 9     | 20,16 | 8,07  |             |
| irga   | p2       | 9     | 27,68 | 7,89  |             |
| irga   | p3       | 9     | 31,90 | 12,16 |             |
| irga   | p4       | 9     | 31,14 | 11,25 |             |
| irga   | p5       | 9     | 26,90 | 6,81  |             |
| irga   | p6       | 9     | 31,12 | 6,95  |             |
| irga   | p7       | 9     | 32,11 | 5,35  |             |
| irga   | p8       | 9     | 31,84 | 4,79  |             |
| Level  | Level    | Level | N     | Data1 |             |
| Years  | Cultivar | Care  |       | Mean  | Stand. Dev. |
| 2007   | fianna   | p1    | 3     | 12,03 | 3,16        |
| 2007   | fianna   | p2    | 3     | 21,68 | 2,52        |
| 2007   | fianna   | p3    | 3     | 20,47 | 2,32        |
| 2007   | fianna   | p4    | 3     | 22,41 | 0,92        |
| 2007   | fianna   | p5    | 3     | 21,83 | 3,26        |
| 2007   | fianna   | p6    | 3     | 21,01 | 3,24        |
| 2007   | fianna   | p7    | 3     | 22,05 | 4,46        |
| 2007   | fianna   | p8    | 3     | 21,54 | 1,81        |
| 2007   | irga     | p1    | 3     | 12,01 | 4,05        |
| 2007   | irga     | p2    | 3     | 23,23 | 1,78        |
| 2007   | irga     | p3    | 3     | 19,37 | 7,68        |
| 2007   | irga     | p4    | 3     | 21,28 | 7,63        |
| 2007   | irga     | p5    | 3     | 20,21 | 3,38        |
| 2007   | irga     | p6    | 3     | 27,24 | 3,72        |
| 2007   | irga     | p7    | 3     | 26,76 | 2,43        |

|  |      |        |    |   |       |       |
|--|------|--------|----|---|-------|-------|
|  | 2007 | irga   | p8 | 3 | 27,55 | 0,85  |
|  | 2008 | fianna | p1 | 3 | 27,39 | 1,99  |
|  | 2008 | fianna | p2 | 3 | 38,13 | 5,47  |
|  | 2008 | fianna | p3 | 3 | 41,99 | 1,45  |
|  | 2008 | fianna | p4 | 3 | 35,99 | 5,03  |
|  | 2008 | fianna | p5 | 3 | 26,40 | 6,25  |
|  | 2008 | fianna | p6 | 3 | 29,91 | 7,40  |
|  | 2008 | fianna | p7 | 3 | 35,73 | 5,50  |
|  | 2008 | fianna | p8 | 3 | 36,65 | 7,43  |
|  | 2008 | irga   | p1 | 3 | 23,25 | 9,42  |
|  | 2008 | irga   | p2 | 3 | 34,09 | 12,19 |
|  | 2008 | irga   | p3 | 3 | 43,20 | 10,16 |
|  | 2008 | irga   | p4 | 3 | 40,94 | 12,34 |
|  | 2008 | irga   | p5 | 3 | 33,97 | 5,18  |
|  | 2008 | irga   | p6 | 3 | 34,51 | 11,55 |
|  | 2008 | irga   | p7 | 3 | 37,83 | 2,66  |
|  | 2008 | irga   | p8 | 3 | 36,91 | 4,45  |
|  | 2009 | fianna | p1 | 3 | 35,33 | 10,25 |
|  | 2009 | fianna | p2 | 3 | 42,20 | 2,69  |
|  | 2009 | fianna | p3 | 3 | 44,93 | 2,16  |
|  | 2009 | fianna | p4 | 3 | 40,53 | 1,50  |
|  | 2009 | fianna | p5 | 3 | 40,27 | 3,58  |
|  | 2009 | fianna | p6 | 3 | 38,80 | 4,53  |
|  | 2009 | fianna | p7 | 3 | 36,00 | 1,39  |
|  | 2009 | fianna | p8 | 3 | 37,47 | 3,90  |
|  | 2009 | irga   | p1 | 3 | 25,20 | 1,74  |
|  | 2009 | irga   | p2 | 3 | 25,73 | 0,61  |
|  | 2009 | irga   | p3 | 3 | 33,13 | 0,64  |
|  | 2009 | irga   | p4 | 3 | 31,20 | 2,43  |

|      |      |    |   |       |      |
|------|------|----|---|-------|------|
| 2009 | irga | p5 | 3 | 26,53 | 2,27 |
| 2009 | irga | p6 | 3 | 31,60 | 2,43 |
| 2009 | irga | p7 | 3 | 31,73 | 3,06 |
| 2009 | irga | p8 | 3 | 31,07 | 2,05 |

Table S2. ANOVA table for comercial tuber yield

| 2. Tukey's studentized range (HSD) test for data2                                                                        |          |    |       |  |  |
|--------------------------------------------------------------------------------------------------------------------------|----------|----|-------|--|--|
| Data2 = commercial yield                                                                                                 |          |    |       |  |  |
| Note: This test checks the Type I error of the experimental group, but generally has a higher Type II error than REGWQ.. |          |    |       |  |  |
| Alpha                                                                                                                    | 0,05     |    |       |  |  |
| Degrees of freedom of error                                                                                              | 96       |    |       |  |  |
| Mean square error                                                                                                        | 28,46503 |    |       |  |  |
| Critical value of the studentized range                                                                                  | 3,36669  |    |       |  |  |
| The difference is minimally significant                                                                                  | 2,5926   |    |       |  |  |
| Medium with the same letter do not differ significantly                                                                  |          |    |       |  |  |
| Grouping Tukey                                                                                                           | Mean     | N  | Years |  |  |
| A                                                                                                                        | 32,931   | 48 | 2009  |  |  |
| A                                                                                                                        |          |    |       |  |  |
| A                                                                                                                        | 32,694   | 48 | 2008  |  |  |
|                                                                                                                          |          |    |       |  |  |
| B                                                                                                                        | 19,194   | 48 | 2007  |  |  |
| Data2= commercial yield                                                                                                  |          |    |       |  |  |
| Note: This test checks the Type I error of the experimental group, but generally has a higher Type II error than REGWQ.. |          |    |       |  |  |
| Alpha                                                                                                                    | 0,05     |    |       |  |  |
| Degrees of freedom of error                                                                                              | 96       |    |       |  |  |
| Mean square error                                                                                                        | 28,46503 |    |       |  |  |

|                                                                                                                           |          |    |          |  |  |
|---------------------------------------------------------------------------------------------------------------------------|----------|----|----------|--|--|
| Critical value of the studentized range                                                                                   | 2,80719  |    |          |  |  |
| The difference is minimally significant                                                                                   | 1,7651   |    |          |  |  |
| Medium with the same letter do not differ significantly                                                                   |          |    |          |  |  |
| Grouping Tukey                                                                                                            | Mean     | N  | Cultivar |  |  |
| A                                                                                                                         | 29,5401  | 72 | fianna   |  |  |
|                                                                                                                           |          |    |          |  |  |
| B                                                                                                                         | 27,0058  | 72 | irga     |  |  |
| Linear models<br>GLM procedure                                                                                            |          |    |          |  |  |
| Tukey's studentized range (HSD) test for data2                                                                            |          |    |          |  |  |
| Data2= commercial yield                                                                                                   |          |    |          |  |  |
| Note: This test checks the Type I error of the experimental group, but generally has a higher Type II error than REGWQ... |          |    |          |  |  |
| Alpha                                                                                                                     | 0,05     |    |          |  |  |
| Degrees of freedom of error                                                                                               | 96       |    |          |  |  |
| Mean square error                                                                                                         | 28,46503 |    |          |  |  |
| Critical value of the studentized range                                                                                   | 4,3824   |    |          |  |  |
| The difference is minimally significant                                                                                   | 5,511    |    |          |  |  |
| Medium with the same letter do not differ significantly                                                                   |          |    |          |  |  |
| Grouping Tukey                                                                                                            | Mean     | N  | Care     |  |  |
| A                                                                                                                         | 32,064   | 18 | p3       |  |  |
| A                                                                                                                         |          |    |          |  |  |
| A                                                                                                                         | 30,107   | 18 | p4       |  |  |
| A                                                                                                                         |          |    |          |  |  |
| A                                                                                                                         | 29,921   | 18 | p7       |  |  |
| A                                                                                                                         |          |    |          |  |  |
| A                                                                                                                         | 29,653   | 18 | p8       |  |  |
| A                                                                                                                         |          |    |          |  |  |
| A                                                                                                                         | 29,034   | 18 | p2       |  |  |

|                          |          |    |            |             |  |
|--------------------------|----------|----|------------|-------------|--|
| A                        |          |    |            |             |  |
| A                        | 28,708   | 18 | p6         |             |  |
| A                        |          |    |            |             |  |
| A                        | 26,696   | 18 | p5         |             |  |
|                          |          |    |            |             |  |
| B                        | 19,999   | 18 | p1         |             |  |
| Linear models            |          |    |            |             |  |
| GLM procedure            |          |    |            |             |  |
| Data2 = commercial yield |          |    |            |             |  |
| Level                    | Level    | N  | data2      |             |  |
| Years                    | Cultivar |    | Mean       | Stand. Dev. |  |
| 2007                     | fianna   | 24 | 17,9704167 | 4,44897886  |  |
| 2007                     | irga     | 24 | 20,4166667 | 6,30706758  |  |
| 2008                     | fianna   | 24 | 32,4441667 | 7,04793767  |  |
| 2008                     | irga     | 24 | 32,94375   | 9,49986078  |  |
| 2009                     | fianna   | 24 | 38,2058333 | 5,08349753  |  |
| 2009                     | irga     | 24 | 27,6570833 | 3,86531452  |  |
| Level                    | Level    | N  | data2      |             |  |
| Years                    | Care     |    | Mean       | Stand. Dev. |  |
| 2007                     | p1       | 6  | 8,5016667  | 2,32973317  |  |
| 2007                     | p2       | 6  | 21,125     | 2,18522081  |  |
| 2007                     | p3       | 6  | 18,245     | 4,56801817  |  |
| 2007                     | p4       | 6  | 19,385     | 4,93787707  |  |
| 2007                     | p5       | 6  | 19,3916667 | 3,28008791  |  |
| 2007                     | p6       | 6  | 22,1583333 | 4,37285452  |  |
| 2007                     | p7       | 6  | 22,5016667 | 3,43598263  |  |
| 2007                     | p8       | 6  | 22,24      | 3,68945524  |  |
| 2008                     | p1       | 6  | 23,0183333 | 6,71056307  |  |
| 2008                     | p2       | 6  | 34,055     | 8,30218465  |  |



|          |       |   |            |             |  |
|----------|-------|---|------------|-------------|--|
| 2008     | p3    | 6 | 40,4066667 | 6,57748787  |  |
| 2008     | p4    | 6 | 36,1283333 | 8,72120729  |  |
| 2008     | p5    | 6 | 28,3866667 | 6,60965859  |  |
| 2008     | p6    | 6 | 30,1833333 | 8,74704445  |  |
| 2008     | p7    | 6 | 34,86      | 4,38412135  |  |
| 2008     | p8    | 6 | 34,5133333 | 5,65724197  |  |
| 2009     | p1    | 6 | 28,4783333 | 9,26304576  |  |
| 2009     | p2    | 6 | 31,9233333 | 9,84319393  |  |
| 2009     | p3    | 6 | 37,5416667 | 7,50813803  |  |
| 2009     | p4    | 6 | 34,8083333 | 5,21294319  |  |
| 2009     | p5    | 6 | 32,31      | 7,9962091   |  |
| 2009     | p6    | 6 | 33,7833333 | 5,00676609  |  |
| 2009     | p7    | 6 | 32,4016667 | 3,56207477  |  |
| 2009     | p8    | 6 | 32,205     | 5,44751962  |  |
| Level    | Level | N | data2      |             |  |
| Cultivar | Care  |   | Mean       | Stand. Dev. |  |
| fianna   | p1    | 9 | 22,3122222 | 12,9015869  |  |
| fianna   | p2    | 9 | 32,3755556 | 9,9055239   |  |
| fianna   | p3    | 9 | 34,3666667 | 11,9995833  |  |
| fianna   | p4    | 9 | 31,0188889 | 9,5216522   |  |
| fianna   | p5    | 9 | 27,9933333 | 9,5685683   |  |
| fianna   | p6    | 9 | 28,2288889 | 8,9136517   |  |
| fianna   | p7    | 9 | 29,8733333 | 8,0487763   |  |
| fianna   | p8    | 9 | 30,1522222 | 9,4603406   |  |
| irga     | p1    | 9 | 17,6866667 | 8,1597564   |  |
| irga     | p2    | 9 | 25,6933333 | 7,4475315   |  |
| irga     | p3    | 9 | 29,7622222 | 11,7186036  |  |
| irga     | p4    | 9 | 29,1955556 | 10,8267644  |  |
| irga     | p5    | 9 | 25,3988889 | 6,6666267   |  |

|       |          |       |            |            |             |
|-------|----------|-------|------------|------------|-------------|
| irga  | p6       | 9     | 29,1877778 | 6,9708424  |             |
| irga  | p7       | 9     | 29,9688889 | 5,1700398  |             |
| irga  | p8       | 9     | 29,1533333 | 4,5622637  |             |
| Level | Level    | Level | N          | data2      |             |
| Years | Cultivar | Care  |            | Mean       | Stand. Dev. |
| 2007  | fianna   | p1    | 3          | 7,5833333  | 1,7141276   |
| 2007  | fianna   | p2    | 3          | 20,0633333 | 2,4354945   |
| 2007  | fianna   | p3    | 3          | 18,67      | 0,7594077   |
| 2007  | fianna   | p4    | 3          | 19,1466667 | 1,1036455   |
| 2007  | fianna   | p5    | 3          | 19,6533333 | 3,2700051   |
| 2007  | fianna   | p6    | 3          | 19,22      | 2,5817049   |
| 2007  | fianna   | p7    | 3          | 20,27      | 3,173216    |
| 2007  | fianna   | p8    | 3          | 19,1566667 | 1,2967781   |
| 2007  | irga     | p1    | 3          | 9,42       | 2,846208    |
| 2007  | irga     | p2    | 3          | 22,1866667 | 1,6201646   |
| 2007  | irga     | p3    | 3          | 17,82      | 7,1448163   |
| 2007  | irga     | p4    | 3          | 19,6233333 | 7,7180395   |
| 2007  | irga     | p5    | 3          | 19,13      | 3,9998875   |
| 2007  | irga     | p6    | 3          | 25,0966667 | 3,9035924   |
| 2007  | irga     | p7    | 3          | 24,7333333 | 2,1224121   |
| 2007  | irga     | p8    | 3          | 25,3233333 | 1,9564594   |
| 2008  | fianna   | p1    | 3          | 24,9933333 | 2,0087392   |
| 2008  | fianna   | p2    | 3          | 36,3       | 5,0671392   |
| 2008  | fianna   | p3    | 3          | 40,2833333 | 2,2393377   |
| 2008  | fianna   | p4    | 3          | 34,7066667 | 5,0313451   |
| 2008  | fianna   | p5    | 3          | 25,2233333 | 6,0903311   |
| 2008  | fianna   | p6    | 3          | 28,1466667 | 6,7648824   |
| 2008  | fianna   | p7    | 3          | 34,5633333 | 6,2100429   |
| 2008  | fianna   | p8    | 3          | 35,3366667 | 7,6911464   |

|      |        |    |   |            |            |
|------|--------|----|---|------------|------------|
| 2008 | irga   | p1 | 3 | 21,0433333 | 9,8408452  |
| 2008 | irga   | p2 | 3 | 31,81      | 11,4682039 |
| 2008 | irga   | p3 | 3 | 40,53      | 10,1537235 |
| 2008 | irga   | p4 | 3 | 37,55      | 12,6004286 |
| 2008 | irga   | p5 | 3 | 31,55      | 6,4889753  |
| 2008 | irga   | p6 | 3 | 32,22      | 11,5355667 |
| 2008 | irga   | p7 | 3 | 35,1566667 | 3,0368789  |
| 2008 | irga   | p8 | 3 | 33,69      | 4,3386173  |
| 2009 | fianna | p1 | 3 | 34,36      | 10,2427682 |
| 2009 | fianna | p2 | 3 | 40,7633333 | 2,202211   |
| 2009 | fianna | p3 | 3 | 44,1466667 | 2,1926316  |
| 2009 | fianna | p4 | 3 | 39,2033333 | 1,9527502  |
| 2009 | fianna | p5 | 3 | 39,1033333 | 4,1778025  |
| 2009 | fianna | p6 | 3 | 37,32      | 4,4340952  |
| 2009 | fianna | p7 | 3 | 34,7866667 | 1,7192537  |
| 2009 | fianna | p8 | 3 | 35,9633333 | 4,9831951  |
| 2009 | irga   | p1 | 3 | 22,5966667 | 2,4111685  |
| 2009 | irga   | p2 | 3 | 23,0833333 | 1,7130772  |
| 2009 | irga   | p3 | 3 | 30,9366667 | 2,2901164  |
| 2009 | irga   | p4 | 3 | 30,4133333 | 2,4850822  |
| 2009 | irga   | p5 | 3 | 25,5166667 | 1,9865129  |
| 2009 | irga   | p6 | 3 | 30,2466667 | 2,3418013  |
| 2009 | irga   | p7 | 3 | 30,0166667 | 3,4205896  |
| 2009 | irga   | p8 | 3 | 28,4466667 | 2,6422024  |

Table S3. ANOVA table for herbicide damage - 7 days after herbicide application

|                                                  |
|--------------------------------------------------|
| 3.Tukey's studentized range (HSD) test for data3 |
|                                                  |

|                                                                                                                          |          |        |       |      |  |
|--------------------------------------------------------------------------------------------------------------------------|----------|--------|-------|------|--|
| Data3 = herbicide damage_7                                                                                               |          |        |       |      |  |
| Note: This test checks the Type I error of the experimental group, but generally has a higher Type II error than REGWQ.. |          |        |       |      |  |
| Alpha                                                                                                                    | 0,05     |        |       |      |  |
| Degrees of freedom of error                                                                                              | 96       |        |       |      |  |
| Mean square error                                                                                                        | 0,395833 |        |       |      |  |
| Critical value of the studentized range                                                                                  | 4,3824   |        |       |      |  |
| The difference is minimally significant                                                                                  | 0,6499   |        |       |      |  |
| Medium with the same letter do not differ significantly                                                                  |          |        |       |      |  |
| Grouping Tukey                                                                                                           |          | Mean   | N     | Care |  |
|                                                                                                                          | A        | 4,6111 | 18    | p5   |  |
|                                                                                                                          | A        |        |       |      |  |
| B                                                                                                                        | A        | 4,1111 | 18    | p7   |  |
| B                                                                                                                        |          |        |       |      |  |
| B                                                                                                                        |          | 3,9444 | 18    | p8   |  |
| B                                                                                                                        |          |        |       |      |  |
| B                                                                                                                        |          | 3,6111 | 18    | p6   |  |
|                                                                                                                          |          |        |       |      |  |
|                                                                                                                          | C        | 2      | 18    | p4   |  |
|                                                                                                                          |          |        |       |      |  |
|                                                                                                                          | D        | 1,0556 | 18    | p3   |  |
|                                                                                                                          |          |        |       |      |  |
|                                                                                                                          | E        | 0      | 18    | p1   |  |
|                                                                                                                          | E        |        |       |      |  |
|                                                                                                                          | E        | 0      | 18    | p2   |  |
| Linear models                                                                                                            |          |        |       |      |  |
| GLM procedure                                                                                                            |          |        |       |      |  |
| Data3=herbicide damage_7                                                                                                 |          |        |       |      |  |
| Level                                                                                                                    | Level    | N      | Data3 |      |  |

| Years | Cultivar |    | Mean       | Stand. Dev. |  |
|-------|----------|----|------------|-------------|--|
| 2007  | fianna   | 24 | 1,875      | 1,59653157  |  |
| 2007  | irga     | 24 | 3,75       | 3,16571305  |  |
| 2008  | fianna   | 24 | 0,875      | 0,61237244  |  |
| 2008  | irga     | 24 | 1,41666667 | 1,01795476  |  |
| 2009  | fianna   | 24 | 2,125      | 1,84891272  |  |
| 2009  | irga     | 24 | 4,45833333 | 3,40050082  |  |
| Level | Level    | N  | Data3      |             |  |
| Years | Care     |    | Mean       | Stand. Dev. |  |
| 2007  | p1       | 6  | 0          | 0           |  |
| 2007  | p2       | 6  | 0          | 0           |  |
| 2007  | p3       | 6  | 1          | 0           |  |
| 2007  | p4       | 6  | 1,5        | 0,54772256  |  |
| 2007  | p5       | 6  | 5,5        | 2,42899156  |  |
| 2007  | p6       | 6  | 4,66666667 | 2,1602469   |  |
| 2007  | p7       | 6  | 5,16666667 | 2,04124145  |  |
| 2007  | p8       | 6  | 4,66666667 | 1,63299316  |  |
| 2008  | p1       | 6  | 0          | 0           |  |
| 2008  | p2       | 6  | 0          | 0           |  |
| 2008  | p3       | 6  | 1          | 0           |  |
| 2008  | p4       | 6  | 1,33333333 | 0,51639778  |  |
| 2008  | p5       | 6  | 2          | 0,89442719  |  |
| 2008  | p6       | 6  | 1,5        | 0,54772256  |  |
| 2008  | p7       | 6  | 1,5        | 0,54772256  |  |
| 2008  | p8       | 6  | 1,83333333 | 0,75277265  |  |
| 2009  | p1       | 6  | 0          | 0           |  |
| 2009  | p2       | 6  | 0          | 0           |  |
| 2009  | p3       | 6  | 1,16666667 | 0,40824829  |  |
| 2009  | p4       | 6  | 3,16666667 | 2,63944439  |  |

|          |          |       |            |             |             |
|----------|----------|-------|------------|-------------|-------------|
| 2009     | p5       | 6     | 6,33333333 | 1,63299316  |             |
| 2009     | p6       | 6     | 4,66666667 | 2,65832027  |             |
| 2009     | p7       | 6     | 5,66666667 | 2,25092574  |             |
| 2009     | p8       | 6     | 5,33333333 | 1,86189867  |             |
| Level    | Level    | N     | Data3      |             |             |
| Cultivar | Care     |       | Mean       | Stand. Dev. |             |
| fianna   | p1       | 9     | 0          | 0           |             |
| fianna   | p2       | 9     | 0          | 0           |             |
| fianna   | p3       | 9     | 1          | 0           |             |
| fianna   | p4       | 9     | 1,22222222 | 0,44095855  |             |
| fianna   | p5       | 9     | 3,22222222 | 1,71593836  |             |
| fianna   | p6       | 9     | 2,11111111 | 1,36422546  |             |
| fianna   | p7       | 9     | 2,66666667 | 1,32287566  |             |
| fianna   | p8       | 9     | 2,77777778 | 1,30170828  |             |
| irga     | p1       | 9     | 0          | 0           |             |
| irga     | p2       | 9     | 0          | 0           |             |
| irga     | p3       | 9     | 1,11111111 | 0,33333333  |             |
| irga     | p4       | 9     | 2,77777778 | 2,16666667  |             |
| irga     | p5       | 9     | 6          | 2,54950976  |             |
| irga     | p6       | 9     | 5,11111111 | 2,3687784   |             |
| irga     | p7       | 9     | 5,55555556 | 2,69773568  |             |
| irga     | p8       | 9     | 5,11111111 | 2,14734979  |             |
| Level    | Level    | Level | N          | Data3       |             |
| Years    | Cultivar | Care  |            | Mean        | Stand. Dev. |
| 2007     | fianna   | p1    | 3          | 0           | 0           |
| 2007     | fianna   | p2    | 3          | 0           | 0           |
| 2007     | fianna   | p3    | 3          | 1           | 0           |
| 2007     | fianna   | p4    | 3          | 1           | 0           |
| 2007     | fianna   | p5    | 3          | 3,33333333  | 0,57735027  |

|      |        |    |   |            |            |
|------|--------|----|---|------------|------------|
| 2007 | fianna | p6 | 3 | 3          | 1,73205081 |
| 2007 | fianna | p7 | 3 | 3,33333333 | 0,57735027 |
| 2007 | fianna | p8 | 3 | 3,33333333 | 1,15470054 |
| 2007 | irga   | p1 | 3 | 0          | 0          |
| 2007 | irga   | p2 | 3 | 0          | 0          |
| 2007 | irga   | p3 | 3 | 1          | 0          |
| 2007 | irga   | p4 | 3 | 2          | 0          |
| 2007 | irga   | p5 | 3 | 7,66666667 | 0,57735027 |
| 2007 | irga   | p6 | 3 | 6,33333333 | 0,57735027 |
| 2007 | irga   | p7 | 3 | 7          | 0          |
| 2007 | irga   | p8 | 3 | 6          | 0          |
| 2008 | fianna | p1 | 3 | 0          | 0          |
| 2008 | fianna | p2 | 3 | 0          | 0          |
| 2008 | fianna | p3 | 3 | 1          | 0          |
| 2008 | fianna | p4 | 3 | 1,33333333 | 0,57735027 |
| 2008 | fianna | p5 | 3 | 1,33333333 | 0,57735027 |
| 2008 | fianna | p6 | 3 | 1          | 0          |
| 2008 | fianna | p7 | 3 | 1          | 0          |
| 2008 | fianna | p8 | 3 | 1,33333333 | 0,57735027 |
| 2008 | irga   | p1 | 3 | 0          | 0          |
| 2008 | irga   | p2 | 3 | 0          | 0          |
| 2008 | irga   | p3 | 3 | 1          | 0          |
| 2008 | irga   | p4 | 3 | 1,33333333 | 0,57735027 |
| 2008 | irga   | p5 | 3 | 2,66666667 | 0,57735027 |
| 2008 | irga   | p6 | 3 | 2          | 0          |
| 2008 | irga   | p7 | 3 | 2          | 0          |
| 2008 | irga   | p8 | 3 | 2,33333333 | 0,57735027 |
| 2009 | fianna | p1 | 3 | 0          | 0          |
| 2009 | fianna | p2 | 3 | 0          | 0          |

|      |        |    |   |            |            |
|------|--------|----|---|------------|------------|
| 2009 | fianna | p3 | 3 | 1          | 0          |
| 2009 | fianna | p4 | 3 | 1,33333333 | 0,57735027 |
| 2009 | fianna | p5 | 3 | 5          | 1          |
| 2009 | fianna | p6 | 3 | 2,33333333 | 1,15470054 |
| 2009 | fianna | p7 | 3 | 3,66666667 | 0,57735027 |
| 2009 | fianna | p8 | 3 | 3,66666667 | 0,57735027 |
| 2009 | irga   | p1 | 3 | 0          | 0          |
| 2009 | irga   | p2 | 3 | 0          | 0          |
| 2009 | irga   | p3 | 3 | 1,33333333 | 0,57735027 |
| 2009 | irga   | p4 | 3 | 5          | 2,64575131 |
| 2009 | irga   | p5 | 3 | 7,66666667 | 0,57735027 |
| 2009 | irga   | p6 | 3 | 7          | 0          |
| 2009 | irga   | p7 | 3 | 7,66666667 | 0,57735027 |
| 2009 | irga   | p8 | 3 | 7          | 0          |

Table S4. ANOVA table for herbicide damage - 14 days after herbicide application

| 4. Tukey's studentized range (HSD) test for data4                                                                       |          |   |       |  |  |
|-------------------------------------------------------------------------------------------------------------------------|----------|---|-------|--|--|
| Data4 = herbicide damage_14                                                                                             |          |   |       |  |  |
| Note: This test checks the Type I error of the experimental group, but generally has a higher Type II error than REGWQ. |          |   |       |  |  |
| Alpha                                                                                                                   | 0,05     |   |       |  |  |
| Degrees of freedom of error                                                                                             | 96       |   |       |  |  |
| Mean square error                                                                                                       | 0,291667 |   |       |  |  |
| Critical value of the studentized range                                                                                 | 3,36669  |   |       |  |  |
| The difference is minimally significant                                                                                 | 0,2624   |   |       |  |  |
| Medium with the same letter do not differ significantly                                                                 |          |   |       |  |  |
| Grouping Tukey                                                                                                          | Mean     | N | Years |  |  |



|                                                                                                                         |          |    |          |  |  |
|-------------------------------------------------------------------------------------------------------------------------|----------|----|----------|--|--|
| A                                                                                                                       | 2,6875   | 48 | 2009     |  |  |
|                                                                                                                         |          |    |          |  |  |
| B                                                                                                                       | 1,6667   | 48 | 2007     |  |  |
|                                                                                                                         |          |    |          |  |  |
| C                                                                                                                       | 1,1042   | 48 | 2008     |  |  |
| Linear models<br>GLM procedure                                                                                          |          |    |          |  |  |
|                                                                                                                         |          |    |          |  |  |
| 4. Tukey's studentized range (HSD) test for data4                                                                       |          |    |          |  |  |
|                                                                                                                         |          |    |          |  |  |
| Data4=herbicide damage_14                                                                                               |          |    |          |  |  |
| Note: This test checks the Type I error of the experimental group, but generally has a higher Type II error than REGWQ. |          |    |          |  |  |
| Alpha                                                                                                                   | 0,05     |    |          |  |  |
| Degrees of freedom of error                                                                                             | 96       |    |          |  |  |
| Mean square error                                                                                                       | 0,291667 |    |          |  |  |
| Critical value of the studentized range                                                                                 | 2,80719  |    |          |  |  |
| The difference is minimally significant                                                                                 | 0,1787   |    |          |  |  |
| Medium with the same letter do not differ significantly                                                                 |          |    |          |  |  |
| Grouping Tukey                                                                                                          | Mean     | N  | Cultivar |  |  |
| A                                                                                                                       | 2,5      | 72 | irga     |  |  |
|                                                                                                                         |          |    |          |  |  |
| B                                                                                                                       | 1,13889  | 72 | fianna   |  |  |
| Modele liniowe                                                                                                          |          |    |          |  |  |
| Procedura GLM                                                                                                           |          |    |          |  |  |
|                                                                                                                         |          |    |          |  |  |
|                                                                                                                         |          |    |          |  |  |
|                                                                                                                         |          |    |          |  |  |
| 4. Tukey's studentized range (HSD) test for data4                                                                       |          |    |          |  |  |

|                                                                                                                         |          |    |      |  |  |
|-------------------------------------------------------------------------------------------------------------------------|----------|----|------|--|--|
| Features 4 = herbicide damage_14                                                                                        |          |    |      |  |  |
| Note: This test checks the Type I error of the experimental group, but generally has a higher Type II error than REGWQ. |          |    |      |  |  |
| Alpha                                                                                                                   | 0,05     |    |      |  |  |
| Degrees of freedom of error                                                                                             | 96       |    |      |  |  |
| Mean square error                                                                                                       | 0,291667 |    |      |  |  |
| Critical value of the studentized range                                                                                 | 4,3824   |    |      |  |  |
| The difference is minimally significant                                                                                 | 0,5579   |    |      |  |  |
| Medium with the same letter do not differ significantly                                                                 |          |    |      |  |  |
| Grouping Tukey                                                                                                          | Mean     | N  | Care |  |  |
| A                                                                                                                       | 3,1667   | 18 | p5   |  |  |
| A                                                                                                                       |          |    |      |  |  |
| A                                                                                                                       | 3        | 18 | p6   |  |  |
| A                                                                                                                       |          |    |      |  |  |
| A                                                                                                                       | 2,9444   | 18 | p8   |  |  |
| A                                                                                                                       |          |    |      |  |  |
| A                                                                                                                       | 2,7778   | 18 | p7   |  |  |
|                                                                                                                         |          |    |      |  |  |
| B                                                                                                                       | 1,6667   | 18 | p4   |  |  |
|                                                                                                                         |          |    |      |  |  |
| C                                                                                                                       | 1        | 18 | p3   |  |  |
|                                                                                                                         |          |    |      |  |  |
| D                                                                                                                       | 0        | 18 | p1   |  |  |
| D                                                                                                                       |          |    |      |  |  |
| D                                                                                                                       | 0        | 18 | p2   |  |  |
| Linear models                                                                                                           |          |    |      |  |  |
| GLM procedure                                                                                                           |          |    |      |  |  |
| Data4=herbicide damage_14                                                                                               |          |    |      |  |  |

| Level | Level    |    | data4      |             |  |
|-------|----------|----|------------|-------------|--|
| Years | Cultivar | N  | Mean       | Stand. Dev. |  |
| 2007  | fianna   | 24 | 1,08333333 | 0,77553161  |  |
| 2007  | irga     | 24 | 2,25       | 1,82375628  |  |
| 2008  | fianna   | 24 | 0,875      | 0,61237244  |  |
| 2008  | irga     | 24 | 1,33333333 | 0,96308682  |  |
| 2009  | fianna   | 24 | 1,45833333 | 1,3824731   |  |
| 2009  | irga     | 24 | 3,91666667 | 3,09159684  |  |
| Level | Level    |    | data4      |             |  |
| Years | Care     | N  | Mean       | Stand. Dev. |  |
| 2007  | p1       | 6  | 0          | 0           |  |
| 2007  | p2       | 6  | 0          | 0           |  |
| 2007  | p3       | 6  | 1          | 0           |  |
| 2007  | p4       | 6  | 1,33333333 | 0,51639778  |  |
| 2007  | p5       | 6  | 3,5        | 1,64316767  |  |
| 2007  | p6       | 6  | 2,33333333 | 1,21106014  |  |
| 2007  | p7       | 6  | 2,66666667 | 1,21106014  |  |
| 2007  | p8       | 6  | 2,5        | 1,22474487  |  |
| 2008  | p1       | 6  | 0          | 0           |  |
| 2008  | p2       | 6  | 0          | 0           |  |
| 2008  | p3       | 6  | 1          | 0           |  |
| 2008  | p4       | 6  | 1,16666667 | 0,40824829  |  |
| 2008  | p5       | 6  | 2          | 0,89442719  |  |
| 2008  | p6       | 6  | 1,5        | 0,54772256  |  |
| 2008  | p7       | 6  | 1,5        | 0,54772256  |  |
| 2008  | p8       | 6  | 1,66666667 | 0,51639778  |  |
| 2009  | p1       | 6  | 0          | 0           |  |
| 2009  | p2       | 6  | 0          | 0           |  |
| 2009  | p3       | 6  | 1          | 0           |  |

|          |          |       |            |             |             |
|----------|----------|-------|------------|-------------|-------------|
| 2009     | p4       | 6     | 2,5        | 2,34520788  |             |
| 2009     | p5       | 6     | 4          | 3,28633535  |             |
| 2009     | p6       | 6     | 5,16666667 | 1,47196014  |             |
| 2009     | p7       | 6     | 4,16666667 | 2,786874    |             |
| 2009     | p8       | 6     | 4,66666667 | 1,86189867  |             |
| Level    | Level    | N     | Data 4     |             |             |
| Cultivar | Care     |       | Mean       | Stand. Dev. |             |
| fianna   | p1       | 9     | 0          | 0           |             |
| fianna   | p2       | 9     | 0          | 0           |             |
| fianna   | p3       | 9     | 1          | 0           |             |
| fianna   | p4       | 9     | 1,11111111 | 0,33333333  |             |
| fianna   | p5       | 9     | 1,44444444 | 0,52704628  |             |
| fianna   | p6       | 9     | 2,11111111 | 1,53659074  |             |
| fianna   | p7       | 9     | 1,44444444 | 0,52704628  |             |
| fianna   | p8       | 9     | 2          | 0,8660254   |             |
| irga     | p1       | 9     | 0          | 0           |             |
| irga     | p2       | 9     | 0          | 0           |             |
| irga     | p3       | 9     | 1          | 0           |             |
| irga     | p4       | 9     | 2,22222222 | 1,92209377  |             |
| irga     | p5       | 9     | 4,88888889 | 1,90029238  |             |
| irga     | p6       | 9     | 3,88888889 | 1,96497102  |             |
| irga     | p7       | 9     | 4,11111111 | 2,08832735  |             |
| irga     | p8       | 9     | 3,88888889 | 2,02758751  |             |
| Level    | Level    | Level | N          | Data 4      |             |
| Years    | Cultivar | Care  |            | Mean        | Stand. Dev. |
| 2007     | fianna   | p1    | 3          | 0           | 0           |
| 2007     | fianna   | p2    | 3          | 0           | 0           |
| 2007     | fianna   | p3    | 3          | 1           | 0           |

|      |        |    |   |            |            |
|------|--------|----|---|------------|------------|
| 2007 | fianna | p4 | 3 | 1          | 0          |
| 2007 | fianna | p5 | 3 | 2          | 0          |
| 2007 | fianna | p6 | 3 | 1,33333333 | 0,57735027 |
| 2007 | fianna | p7 | 3 | 1,66666667 | 0,57735027 |
| 2007 | fianna | p8 | 3 | 1,66666667 | 0,57735027 |
| 2007 | irga   | p1 | 3 | 0          | 0          |
| 2007 | irga   | p2 | 3 | 0          | 0          |
| 2007 | irga   | p3 | 3 | 1          | 0          |
| 2007 | irga   | p4 | 3 | 1,66666667 | 0,57735027 |
| 2007 | irga   | p5 | 3 | 5          | 0          |
| 2007 | irga   | p6 | 3 | 3,33333333 | 0,57735027 |
| 2007 | irga   | p7 | 3 | 3,66666667 | 0,57735027 |
| 2007 | irga   | p8 | 3 | 3,33333333 | 1,15470054 |
| 2008 | fianna | p1 | 3 | 0          | 0          |
| 2008 | fianna | p2 | 3 | 0          | 0          |
| 2008 | fianna | p3 | 3 | 1          | 0          |
| 2008 | fianna | p4 | 3 | 1,33333333 | 0,57735027 |
| 2008 | fianna | p5 | 3 | 1,33333333 | 0,57735027 |
| 2008 | fianna | p6 | 3 | 1          | 0          |
| 2008 | fianna | p7 | 3 | 1          | 0          |
| 2008 | fianna | p8 | 3 | 1,33333333 | 0,57735027 |
| 2008 | irga   | p1 | 3 | 0          | 0          |
| 2008 | irga   | p2 | 3 | 0          | 0          |
| 2008 | irga   | p3 | 3 | 1          | 0          |
| 2008 | irga   | p4 | 3 | 1          | 0          |
| 2008 | irga   | p5 | 3 | 2,66666667 | 0,57735027 |
| 2008 | irga   | p6 | 3 | 2          | 0          |
| 2008 | irga   | p7 | 3 | 2          | 0          |
| 2008 | irga   | p8 | 3 | 2          | 0          |

|      |        |    |   |            |            |
|------|--------|----|---|------------|------------|
| 2009 | fianna | p1 | 3 | 0          | 0          |
| 2009 | fianna | p2 | 3 | 0          | 0          |
| 2009 | fianna | p3 | 3 | 1          | 0          |
| 2009 | fianna | p4 | 3 | 1          | 0          |
| 2009 | fianna | p5 | 3 | 1          | 0          |
| 2009 | fianna | p6 | 3 | 4          | 1          |
| 2009 | fianna | p7 | 3 | 1,66666667 | 0,57735027 |
| 2009 | fianna | p8 | 3 | 3          | 0          |
| 2009 | irga   | p1 | 3 | 0          | 0          |
| 2009 | irga   | p2 | 3 | 0          | 0          |
| 2009 | irga   | p3 | 3 | 1          | 0          |
| 2009 | irga   | p4 | 3 | 4          | 2,64575131 |
| 2009 | irga   | p5 | 3 | 7          | 0          |
| 2009 | irga   | p6 | 3 | 6,33333333 | 0,57735027 |
| 2009 | irga   | p7 | 3 | 6,66666667 | 0,57735027 |
| 2009 | irga   | p8 | 3 | 6,33333333 | 0,57735027 |

Table S5. ANOVA table for herbicide damage - 21 days after herbicide application

| 5. Tukey's studentized range (HSD) test for data5                                                                       |          |  |  |  |  |
|-------------------------------------------------------------------------------------------------------------------------|----------|--|--|--|--|
|                                                                                                                         |          |  |  |  |  |
| Data5=herbicide damage_21                                                                                               |          |  |  |  |  |
| Note: This test checks the Type I error of the experimental group, but generally has a higher Type II error than REGWQ. |          |  |  |  |  |
| Alpha                                                                                                                   | 0,05     |  |  |  |  |
| Degrees of freedom of error                                                                                             | 96       |  |  |  |  |
| Mean square error                                                                                                       | 0,354167 |  |  |  |  |
| Critical value of the studentized range                                                                                 | 3,36669  |  |  |  |  |
| The difference is minimally significant                                                                                 | 0,2892   |  |  |  |  |

|                                                                                                                         |          |    |          |  |  |
|-------------------------------------------------------------------------------------------------------------------------|----------|----|----------|--|--|
| Medium with the same letter do not differ significantly                                                                 |          |    |          |  |  |
| Grouping Tukey                                                                                                          | Mean     | N  | Years    |  |  |
| A                                                                                                                       | 2,1042   | 48 | 2009     |  |  |
|                                                                                                                         |          |    |          |  |  |
| B                                                                                                                       | 1,1667   | 48 | 2007     |  |  |
| B                                                                                                                       |          |    |          |  |  |
| B                                                                                                                       | 1,0417   | 48 | 2008     |  |  |
| Linear models                                                                                                           |          |    |          |  |  |
| GLM procedure                                                                                                           |          |    |          |  |  |
| 5. Tukey's studentized range (HSD) test for data5                                                                       |          |    |          |  |  |
|                                                                                                                         |          |    |          |  |  |
| Data5=herbicide damage_21                                                                                               |          |    |          |  |  |
| Note: This test checks the Type I error of the experimental group, but generally has a higher Type II error than REGWQ. |          |    |          |  |  |
| Alpha                                                                                                                   | 0,05     |    |          |  |  |
| Degrees of freedom of error                                                                                             | 96       |    |          |  |  |
| Mean square error                                                                                                       | 0,354167 |    |          |  |  |
| Critical value of the studentized range                                                                                 | 2,80719  |    |          |  |  |
| The difference is minimally significant                                                                                 | 0,1969   |    |          |  |  |
| Medium with the same letter do not differ significantly                                                                 |          |    |          |  |  |
| Grouping Tukey                                                                                                          | Mean     | N  | Cultivar |  |  |
| A                                                                                                                       | 1,81944  | 72 | irga     |  |  |
|                                                                                                                         |          |    |          |  |  |
| B                                                                                                                       | 1,05556  | 72 | fianna   |  |  |
| Linear models                                                                                                           |          |    |          |  |  |
| GLM procedure                                                                                                           |          |    |          |  |  |
| 5. Tukey's studentized range (HSD) test for data5                                                                       |          |    |          |  |  |
|                                                                                                                         |          |    |          |  |  |
| cechy4=herbicide damage_21                                                                                              |          |    |          |  |  |

|                                                                                                                         |          |        |       |             |  |
|-------------------------------------------------------------------------------------------------------------------------|----------|--------|-------|-------------|--|
| Note: This test checks the Type I error of the experimental group, but generally has a higher Type II error than REGWQ. |          |        |       |             |  |
| Alpha                                                                                                                   | 0,05     |        |       |             |  |
| Degrees of freedom of error                                                                                             | 96       |        |       |             |  |
| Mean square error                                                                                                       | 0,354167 |        |       |             |  |
| Critical value of the studentized range                                                                                 | 4,3824   |        |       |             |  |
| The difference is minimally significant                                                                                 | 0,6147   |        |       |             |  |
| Medium with the same letter do not differ significantly                                                                 |          |        |       |             |  |
| Grouping Tukey                                                                                                          |          | Mean   | N     | Care        |  |
|                                                                                                                         | A        | 2,4444 | 18    | p5          |  |
|                                                                                                                         | A        |        |       |             |  |
| B                                                                                                                       | A        | 2,1111 | 18    | p8          |  |
| B                                                                                                                       | A        |        |       |             |  |
| B                                                                                                                       | A        | 2,0556 | 18    | p6          |  |
| B                                                                                                                       | A        |        |       |             |  |
| B                                                                                                                       | A        | 1,8889 | 18    | p7          |  |
| B                                                                                                                       |          |        |       |             |  |
| B                                                                                                                       | C        | 1,7778 | 18    | p4          |  |
|                                                                                                                         | C        |        |       |             |  |
|                                                                                                                         | C        | 1,2222 | 18    | p3          |  |
|                                                                                                                         |          |        |       |             |  |
|                                                                                                                         | D        | 0      | 18    | p1          |  |
|                                                                                                                         | D        |        |       |             |  |
|                                                                                                                         | D        | 0      | 18    | p2          |  |
| Linear models<br>GLM procedure                                                                                          |          |        |       |             |  |
| Data5=herbicide damage_21                                                                                               |          |        |       |             |  |
| Level                                                                                                                   | Level    | N      | Data5 |             |  |
| Years                                                                                                                   | Cultivar |        | Mean  | Stand. Dev. |  |



|       |        |    |            |             |  |
|-------|--------|----|------------|-------------|--|
| 2007  | fianna | 24 | 1,125      | 0,89987922  |  |
| 2007  | irga   | 24 | 1,20833333 | 0,88362724  |  |
| 2008  | fianna | 24 | 0,875      | 0,61237244  |  |
| 2008  | irga   | 24 | 1,20833333 | 0,83297094  |  |
| 2009  | fianna | 24 | 1,16666667 | 0,86811473  |  |
| 2009  | irga   | 24 | 3,04166667 | 2,4579802   |  |
| Level | Level  | N  | Data5      |             |  |
| Years | Care   |    | Mean       | Stand. Dev. |  |
| 2007  | p1     | 6  | 0          | 0           |  |
| 2007  | p2     | 6  | 0          | 0           |  |
| 2007  | p3     | 6  | 1,5        | 0,83666003  |  |
| 2007  | p4     | 6  | 2          | 0,63245553  |  |
| 2007  | p5     | 6  | 1,5        | 0,54772256  |  |
| 2007  | p6     | 6  | 1,5        | 0,83666003  |  |
| 2007  | p7     | 6  | 1,33333333 | 0,51639778  |  |
| 2007  | p8     | 6  | 1,5        | 0,54772256  |  |
| 2008  | p1     | 6  | 0          | 0           |  |
| 2008  | p2     | 6  | 0          | 0           |  |
| 2008  | p3     | 6  | 1          | 0           |  |
| 2008  | p4     | 6  | 1,33333333 | 0,51639778  |  |
| 2008  | p5     | 6  | 1,66666667 | 0,51639778  |  |
| 2008  | p6     | 6  | 1,5        | 0,54772256  |  |
| 2008  | p7     | 6  | 1,16666667 | 0,40824829  |  |
| 2008  | p8     | 6  | 1,66666667 | 0,51639778  |  |
| 2009  | p1     | 6  | 0          | 0           |  |
| 2009  | p2     | 6  | 0          | 0           |  |
| 2009  | p3     | 6  | 1,16666667 | 0,40824829  |  |
| 2009  | p4     | 6  | 2          | 1,54919334  |  |
| 2009  | p5     | 6  | 4,16666667 | 2,40138849  |  |

|          |          |       |            |             |             |
|----------|----------|-------|------------|-------------|-------------|
| 2009     | p6       | 6     | 3,16666667 | 2,04124145  |             |
| 2009     | p7       | 6     | 3,16666667 | 2,13697606  |             |
| 2009     | p8       | 6     | 3,16666667 | 1,32916014  |             |
| Level    | Level    | N     | Data5      |             |             |
| Cultivar | Care     |       | Mean       | Stand. Dev. |             |
| fianna   | p1       | 9     | 0          | 0           |             |
| fianna   | p2       | 9     | 0          | 0           |             |
| fianna   | p3       | 9     | 1,33333333 | 0,70710678  |             |
| fianna   | p4       | 9     | 1,44444444 | 0,72648316  |             |
| fianna   | p5       | 9     | 1,55555556 | 0,72648316  |             |
| fianna   | p6       | 9     | 1,22222222 | 0,44095855  |             |
| fianna   | p7       | 9     | 1,22222222 | 0,44095855  |             |
| fianna   | p8       | 9     | 1,66666667 | 0,5         |             |
| irga     | p1       | 9     | 0          | 0           |             |
| irga     | p2       | 9     | 0          | 0           |             |
| irga     | p3       | 9     | 1,11111111 | 0,33333333  |             |
| irga     | p4       | 9     | 2,11111111 | 1,16666667  |             |
| irga     | p5       | 9     | 3,33333333 | 2,23606798  |             |
| irga     | p6       | 9     | 2,88888889 | 1,69148193  |             |
| irga     | p7       | 9     | 2,55555556 | 1,94365063  |             |
| irga     | p8       | 9     | 2,55555556 | 1,42400062  |             |
| Level    | Level    | Level | N          | Data5       |             |
| Years    | Cultivar | Care  |            | Mean        | Stand. Dev. |
| 2007     | fianna   | p1    | 3          | 0           | 0           |
| 2007     | fianna   | p2    | 3          | 0           | 0           |
| 2007     | fianna   | p3    | 3          | 1,66666667  | 1,15470054  |
| 2007     | fianna   | p4    | 3          | 2           | 1           |
| 2007     | fianna   | p5    | 3          | 1           | 0           |
| 2007     | fianna   | p6    | 3          | 1,33333333  | 0,57735027  |

|      |        |    |   |            |            |
|------|--------|----|---|------------|------------|
| 2007 | fianna | p7 | 3 | 1,33333333 | 0,57735027 |
| 2007 | fianna | p8 | 3 | 1,66666667 | 0,57735027 |
| 2007 | irga   | p1 | 3 | 0          | 0          |
| 2007 | irga   | p2 | 3 | 0          | 0          |
| 2007 | irga   | p3 | 3 | 1,33333333 | 0,57735027 |
| 2007 | irga   | p4 | 3 | 2          | 0          |
| 2007 | irga   | p5 | 3 | 2          | 0          |
| 2007 | irga   | p6 | 3 | 1,66666667 | 1,15470054 |
| 2007 | irga   | p7 | 3 | 1,33333333 | 0,57735027 |
| 2007 | irga   | p8 | 3 | 1,33333333 | 0,57735027 |
| 2008 | fianna | p1 | 3 | 0          | 0          |
| 2008 | fianna | p2 | 3 | 0          | 0          |
| 2008 | fianna | p3 | 3 | 1          | 0          |
| 2008 | fianna | p4 | 3 | 1,33333333 | 0,57735027 |
| 2008 | fianna | p5 | 3 | 1,33333333 | 0,57735027 |
| 2008 | fianna | p6 | 3 | 1          | 0          |
| 2008 | fianna | p7 | 3 | 1          | 0          |
| 2008 | fianna | p8 | 3 | 1,33333333 | 0,57735027 |
| 2008 | irga   | p1 | 3 | 0          | 0          |
| 2008 | irga   | p2 | 3 | 0          | 0          |
| 2008 | irga   | p3 | 3 | 1          | 0          |
| 2008 | irga   | p4 | 3 | 1,33333333 | 0,57735027 |
| 2008 | irga   | p5 | 3 | 2          | 0          |
| 2008 | irga   | p6 | 3 | 2          | 0          |
| 2008 | irga   | p7 | 3 | 1,33333333 | 0,57735027 |
| 2008 | irga   | p8 | 3 | 2          | 0          |
| 2009 | fianna | p1 | 3 | 0          | 0          |
| 2009 | fianna | p2 | 3 | 0          | 0          |
| 2009 | fianna | p3 | 3 | 1,33333333 | 0,57735027 |

|      |        |    |   |            |            |
|------|--------|----|---|------------|------------|
| 2009 | fianna | p4 | 3 | 1          | 0          |
| 2009 | fianna | p5 | 3 | 2,33333333 | 0,57735027 |
| 2009 | fianna | p6 | 3 | 1,33333333 | 0,57735027 |
| 2009 | fianna | p7 | 3 | 1,33333333 | 0,57735027 |
| 2009 | fianna | p8 | 3 | 2          | 0          |
| 2009 | irga   | p1 | 3 | 0          | 0          |
| 2009 | irga   | p2 | 3 | 0          | 0          |
| 2009 | irga   | p3 | 3 | 1          | 0          |
| 2009 | irga   | p4 | 3 | 3          | 1,73205081 |
| 2009 | irga   | p5 | 3 | 6          | 2          |
| 2009 | irga   | p6 | 3 | 5          | 0          |
| 2009 | irga   | p7 | 3 | 5          | 1          |
| 2009 | irga   | p8 | 3 | 4,33333333 | 0,57735027 |

Table S6. ANOVA table for herbicide damage - 28 days after herbicide application

| 6. Tukey's studentized range (HSD) test for data6                                                                       |          |    |          |  |  |
|-------------------------------------------------------------------------------------------------------------------------|----------|----|----------|--|--|
| Data 6=herbicide damage_28                                                                                              |          |    |          |  |  |
| Note: This test checks the Type I error of the experimental group, but generally has a higher Type II error than REGWQ. |          |    |          |  |  |
| Alpha                                                                                                                   | 0,05     |    |          |  |  |
| Degrees of freedom of error                                                                                             | 96       |    |          |  |  |
| Mean square error                                                                                                       | 0,263889 |    |          |  |  |
| Critical value of the studentized range                                                                                 | 2,80719  |    |          |  |  |
| The difference is minimally significant                                                                                 | 0,1699   |    |          |  |  |
| Medium with the same letter do not differ significantly                                                                 |          |    |          |  |  |
| Grouping Tukey                                                                                                          | Mean     | N  | Cultivar |  |  |
| A                                                                                                                       | 1,75     | 72 | irga     |  |  |

|                                                                                                                         |          |        |        |      |  |
|-------------------------------------------------------------------------------------------------------------------------|----------|--------|--------|------|--|
|                                                                                                                         |          |        |        |      |  |
| B                                                                                                                       | 0,94444  | 72     | fianna |      |  |
| Linear models<br>GLM procedure                                                                                          |          |        |        |      |  |
| 6. Tukey's studentized range (HSD) test for data6                                                                       |          |        |        |      |  |
|                                                                                                                         |          |        |        |      |  |
| Data6=herbicide damage_28                                                                                               |          |        |        |      |  |
| Note: This test checks the Type I error of the experimental group, but generally has a higher Type II error than REGWQ. |          |        |        |      |  |
| Alpha                                                                                                                   | 0,05     |        |        |      |  |
| Degrees of freedom of error                                                                                             | 96       |        |        |      |  |
| Mean square error                                                                                                       | 0,263889 |        |        |      |  |
| Critical value of the studentized range                                                                                 | 4,3824   |        |        |      |  |
| The difference is minimally significant                                                                                 | 0,5306   |        |        |      |  |
| Medium with the same letter do not differ significantly                                                                 |          |        |        |      |  |
| Grouping Tukey                                                                                                          |          | Mean   | N      | Care |  |
|                                                                                                                         | A        | 2,3889 | 18     | p5   |  |
|                                                                                                                         | A        |        |        |      |  |
| B                                                                                                                       | A        | 1,9444 | 18     | p8   |  |
| B                                                                                                                       | A        |        |        |      |  |
| B                                                                                                                       | A        | 1,8889 | 18     | p6   |  |
| B                                                                                                                       |          |        |        |      |  |
| B                                                                                                                       |          | 1,7778 | 18     | p7   |  |
| B                                                                                                                       |          |        |        |      |  |
| B                                                                                                                       | C        | 1,5556 | 18     | p4   |  |
|                                                                                                                         | C        |        |        |      |  |
|                                                                                                                         | C        | 1,2222 | 18     | p3   |  |
|                                                                                                                         |          |        |        |      |  |
|                                                                                                                         | D        | 0      | 18     | p1   |  |

|                                |          |    |            |               |  |
|--------------------------------|----------|----|------------|---------------|--|
|                                | D        |    |            |               |  |
|                                | D        | 0  | 18         | p2            |  |
| Linear models<br>GLM procedure |          |    |            |               |  |
| Data6=herbicide damage_28      |          |    |            |               |  |
| Level                          | Level    |    | Data6      |               |  |
| Years                          | Cultivar |    | Mean       | Standard Dev. |  |
| 2007                           | fianna   | 24 | 0,79166667 | 0,50897738    |  |
| 2007                           | irga     | 24 | 1          | 0,72231512    |  |
| 2008                           | fianna   | 24 | 0,875      | 0,61237244    |  |
| 2008                           | irga     | 24 | 1,20833333 | 0,83297094    |  |
| 2009                           | fianna   | 24 | 1,16666667 | 0,86811473    |  |
| 2009                           | irga     | 24 | 3,04166667 | 2,4579802     |  |
| Level                          | Level    |    | Data6      |               |  |
| Years                          | Care     |    | Mean       | Standard Dev. |  |
| 2007                           | p1       | 6  | 0          | 0             |  |
| 2007                           | p2       | 6  | 0          | 0             |  |
| 2007                           | p3       | 6  | 1,5        | 0,54772256    |  |
| 2007                           | p4       | 6  | 1,33333333 | 0,51639778    |  |
| 2007                           | p5       | 6  | 1,33333333 | 0,51639778    |  |
| 2007                           | p6       | 6  | 1          | 0             |  |
| 2007                           | p7       | 6  | 1          | 0             |  |
| 2007                           | p8       | 6  | 1          | 0             |  |
| 2008                           | p1       | 6  | 0          | 0             |  |
| 2008                           | p2       | 6  | 0          | 0             |  |
| 2008                           | p3       | 6  | 1          | 0             |  |
| 2008                           | p4       | 6  | 1,33333333 | 0,51639778    |  |

|          |       |   |            |             |  |
|----------|-------|---|------------|-------------|--|
| 2008     | p5    | 6 | 1,66666667 | 0,51639778  |  |
| 2008     | p6    | 6 | 1,5        | 0,54772256  |  |
| 2008     | p7    | 6 | 1,16666667 | 0,40824829  |  |
| 2008     | p8    | 6 | 1,66666667 | 0,51639778  |  |
| 2009     | p1    | 6 | 0          | 0           |  |
| 2009     | p2    | 6 | 0          | 0           |  |
| 2009     | p3    | 6 | 1,16666667 | 0,40824829  |  |
| 2009     | p4    | 6 | 2          | 1,54919334  |  |
| 2009     | p5    | 6 | 4,16666667 | 2,40138849  |  |
| 2009     | p6    | 6 | 3,16666667 | 2,04124145  |  |
| 2009     | p7    | 6 | 3,16666667 | 2,13697606  |  |
| 2009     | p8    | 6 | 3,16666667 | 1,32916014  |  |
| Level    | Level | N | Data6      |             |  |
| Cultivar | Care  |   | Mean       | Stand. Dev. |  |
| fianna   | p1    | 9 | 0          | 0           |  |
| fianna   | p2    | 9 | 0          | 0           |  |
| fianna   | p3    | 9 | 1,22222222 | 0,44095855  |  |
| fianna   | p4    | 9 | 1,11111111 | 0,33333333  |  |
| fianna   | p5    | 9 | 1,55555556 | 0,72648316  |  |
| fianna   | p6    | 9 | 1,11111111 | 0,33333333  |  |
| fianna   | p7    | 9 | 1,11111111 | 0,33333333  |  |
| fianna   | p8    | 9 | 1,44444444 | 0,52704628  |  |
| irga     | p1    | 9 | 0          | 0           |  |
| irga     | p2    | 9 | 0          | 0           |  |
| irga     | p3    | 9 | 1,22222222 | 0,44095855  |  |
| irga     | p4    | 9 | 2          | 1,22474487  |  |
| irga     | p5    | 9 | 3,22222222 | 2,33333333  |  |
| irga     | p6    | 9 | 2,66666667 | 1,80277564  |  |
| irga     | p7    | 9 | 2,44444444 | 2,00693243  |  |

|       |          |       |            |            |             |
|-------|----------|-------|------------|------------|-------------|
| irga  | p8       | 9     | 2,44444444 | 1,50923086 |             |
| Level | Level    | Level | N          | Data6      |             |
| Years | Cultivar | Care  |            | Mean       | Stand. Dev. |
| 2007  | fianna   | p1    | 3          | 0          | 0           |
| 2007  | fianna   | p2    | 3          | 0          | 0           |
| 2007  | fianna   | p3    | 3          | 1,33333333 | 0,57735027  |
| 2007  | fianna   | p4    | 3          | 1          | 0           |
| 2007  | fianna   | p5    | 3          | 1          | 0           |
| 2007  | fianna   | p6    | 3          | 1          | 0           |
| 2007  | fianna   | p7    | 3          | 1          | 0           |
| 2007  | fianna   | p8    | 3          | 1          | 0           |
| 2007  | irga     | p1    | 3          | 0          | 0           |
| 2007  | irga     | p2    | 3          | 0          | 0           |
| 2007  | irga     | p3    | 3          | 1,66666667 | 0,57735027  |
| 2007  | irga     | p4    | 3          | 1,66666667 | 0,57735027  |
| 2007  | irga     | p5    | 3          | 1,66666667 | 0,57735027  |
| 2007  | irga     | p6    | 3          | 1          | 0           |
| 2007  | irga     | p7    | 3          | 1          | 0           |
| 2007  | irga     | p8    | 3          | 1          | 0           |
| 2008  | fianna   | p1    | 3          | 0          | 0           |
| 2008  | fianna   | p2    | 3          | 0          | 0           |
| 2008  | fianna   | p3    | 3          | 1          | 0           |
| 2008  | fianna   | p4    | 3          | 1,33333333 | 0,57735027  |
| 2008  | fianna   | p5    | 3          | 1,33333333 | 0,57735027  |
| 2008  | fianna   | p6    | 3          | 1          | 0           |
| 2008  | fianna   | p7    | 3          | 1          | 0           |
| 2008  | fianna   | p8    | 3          | 1,33333333 | 0,57735027  |
| 2008  | irga     | p1    | 3          | 0          | 0           |
| 2008  | irga     | p2    | 3          | 0          | 0           |



|      |        |    |   |            |            |
|------|--------|----|---|------------|------------|
| 2008 | irga   | p3 | 3 | 1          | 0          |
| 2008 | irga   | p4 | 3 | 1,33333333 | 0,57735027 |
| 2008 | irga   | p5 | 3 | 2          | 0          |
| 2008 | irga   | p6 | 3 | 2          | 0          |
| 2008 | irga   | p7 | 3 | 1,33333333 | 0,57735027 |
| 2008 | irga   | p8 | 3 | 2          | 0          |
| 2009 | fianna | p1 | 3 | 0          | 0          |
| 2009 | fianna | p2 | 3 | 0          | 0          |
| 2009 | fianna | p3 | 3 | 1,33333333 | 0,57735027 |
| 2009 | fianna | p4 | 3 | 1          | 0          |
| 2009 | fianna | p5 | 3 | 2,33333333 | 0,57735027 |
| 2009 | fianna | p6 | 3 | 1,33333333 | 0,57735027 |
| 2009 | fianna | p7 | 3 | 1,33333333 | 0,57735027 |
| 2009 | fianna | p8 | 3 | 2          | 0          |
| 2009 | irga   | p1 | 3 | 0          | 0          |
| 2009 | irga   | p2 | 3 | 0          | 0          |
| 2009 | irga   | p3 | 3 | 1          | 0          |
| 2009 | irga   | p4 | 3 | 3          | 1,73205081 |
| 2009 | irga   | p5 | 3 | 6          | 2          |
| 2009 | irga   | p6 | 3 | 5          | 0          |
| 2009 | irga   | p7 | 3 | 5          | 1          |
| 2009 | irga   | p8 | 3 | 4,33333333 | 0,57735027 |

Table S7. ANOVA table for herbicide damage - 35 days after herbicide application

|                                                                                                                         |
|-------------------------------------------------------------------------------------------------------------------------|
| 7. Tukey's studentized range (HSD) test for data7                                                                       |
| Data7=herbicide damage_35                                                                                               |
| Note: This test checks the Type I error of the experimental group, but generally has a higher Type II error than REGWQ. |

|                                                                                                                         |          |    |          |  |  |
|-------------------------------------------------------------------------------------------------------------------------|----------|----|----------|--|--|
| Alpha                                                                                                                   | 0,05     |    |          |  |  |
| Degrees of freedom of error                                                                                             | 96       |    |          |  |  |
| Mean square error                                                                                                       | 0,097222 |    |          |  |  |
| Critical value of the studentized range                                                                                 | 3,36669  |    |          |  |  |
| The difference is minimally significant                                                                                 | 0,1515   |    |          |  |  |
| Medium with the same letter do not differ significantly                                                                 |          |    |          |  |  |
| Grouping Tukey                                                                                                          | Mean     | N  | Years    |  |  |
| A                                                                                                                       | 1,02083  | 48 | 2009     |  |  |
|                                                                                                                         |          |    |          |  |  |
| B                                                                                                                       | 0,83333  | 48 | 2007     |  |  |
| B                                                                                                                       |          |    |          |  |  |
| B                                                                                                                       | 0,75     | 48 | 2008     |  |  |
| Linear models                                                                                                           |          |    |          |  |  |
| GLM procedure                                                                                                           |          |    |          |  |  |
| 7. Tukey's studentized range (HSD) test for data7                                                                       |          |    |          |  |  |
|                                                                                                                         |          |    |          |  |  |
| Data7=herbicide damage_35                                                                                               |          |    |          |  |  |
| Note: This test checks the Type I error of the experimental group, but generally has a higher Type II error than REGWQ. |          |    |          |  |  |
| Alpha                                                                                                                   | 0,05     |    |          |  |  |
| Degrees of freedom of error                                                                                             | 96       |    |          |  |  |
| Mean square error                                                                                                       | 0,097222 |    |          |  |  |
| Critical value of the studentized range                                                                                 | 2,80719  |    |          |  |  |
| The difference is minimally significant                                                                                 | 0,1032   |    |          |  |  |
| Medium with the same letter do not differ significantly                                                                 |          |    |          |  |  |
| Grouping Tukey                                                                                                          | Mean     | N  | Cultivar |  |  |
| A                                                                                                                       | 0,97222  | 72 | irga     |  |  |
|                                                                                                                         |          |    |          |  |  |
| B                                                                                                                       | 0,76389  | 72 | fianna   |  |  |

|                                                                                                                         |          |    |      |  |  |
|-------------------------------------------------------------------------------------------------------------------------|----------|----|------|--|--|
| Linear models<br>GLM procedure                                                                                          |          |    |      |  |  |
| 7. Tukey's studentized range (HSD) test for data7                                                                       |          |    |      |  |  |
|                                                                                                                         |          |    |      |  |  |
| Data7=herbicide damage_35                                                                                               |          |    |      |  |  |
| Note: This test checks the Type I error of the experimental group, but generally has a higher Type II error than REGWQ. |          |    |      |  |  |
| Alpha                                                                                                                   | 0,05     |    |      |  |  |
| Degrees of freedom of error                                                                                             | 96       |    |      |  |  |
| Mean square error                                                                                                       | 0,097222 |    |      |  |  |
| Critical value of the studentized range                                                                                 | 4,3824   |    |      |  |  |
| The difference is minimally significant                                                                                 | 0,3221   |    |      |  |  |
| Medium with the same letter do not differ significantly                                                                 |          |    |      |  |  |
| Grouping Tukey                                                                                                          | Mean     | N  | Care |  |  |
| A                                                                                                                       | 1,2222   | 18 | p8   |  |  |
| A                                                                                                                       |          |    |      |  |  |
| A                                                                                                                       | 1,1667   | 18 | p5   |  |  |
| A                                                                                                                       |          |    |      |  |  |
| A                                                                                                                       | 1,1667   | 18 | p3   |  |  |
| A                                                                                                                       |          |    |      |  |  |
| A                                                                                                                       | 1,1667   | 18 | p7   |  |  |
| A                                                                                                                       |          |    |      |  |  |
| A                                                                                                                       | 1,1111   | 18 | p6   |  |  |
| A                                                                                                                       |          |    |      |  |  |
| A                                                                                                                       | 1,1111   | 18 | p4   |  |  |
|                                                                                                                         |          |    |      |  |  |
| B                                                                                                                       | 0        | 18 | p1   |  |  |
| B                                                                                                                       |          |    |      |  |  |
| B                                                                                                                       | 0        | 18 | p2   |  |  |

| Linear models<br>GLM procedure |          |    |            |             |  |
|--------------------------------|----------|----|------------|-------------|--|
| Data7=herbicide damage_35      |          |    |            |             |  |
| Level                          | Level    | N  | Data7      |             |  |
| Years                          | Cultivar |    | Mean       | Stand. Dev. |  |
| 2007                           | fianna   | 24 | 0,79166667 | 0,50897738  |  |
| 2007                           | irga     | 24 | 0,875      | 0,61237244  |  |
| 2008                           | fianna   | 24 | 0,75       | 0,44232587  |  |
| 2008                           | irga     | 24 | 0,75       | 0,44232587  |  |
| 2009                           | fianna   | 24 | 0,75       | 0,44232587  |  |
| 2009                           | irga     | 24 | 1,29166667 | 0,99909379  |  |
| Level                          | Level    | N  | Data7      |             |  |
| Years                          | Care     |    | Mean       | Stand. Dev. |  |
| 2007                           | p1       | 6  | 0          | 0           |  |
| 2007                           | p2       | 6  | 0          | 0           |  |
| 2007                           | p3       | 6  | 1,33333333 | 0,51639778  |  |
| 2007                           | p4       | 6  | 1,16666667 | 0,40824829  |  |
| 2007                           | p5       | 6  | 1,16666667 | 0,40824829  |  |
| 2007                           | p6       | 6  | 1          | 0           |  |
| 2007                           | p7       | 6  | 1          | 0           |  |
| 2007                           | p8       | 6  | 1          | 0           |  |
| 2008                           | p1       | 6  | 0          | 0           |  |
| 2008                           | p2       | 6  | 0          | 0           |  |
| 2008                           | p3       | 6  | 1          | 0           |  |
| 2008                           | p4       | 6  | 1          | 0           |  |
| 2008                           | p5       | 6  | 1          | 0           |  |
| 2008                           | p6       | 6  | 1          | 0           |  |
| 2008                           | p7       | 6  | 1          | 0           |  |
| 2008                           | p8       | 6  | 1          | 0           |  |

|          |          |       |            |             |             |
|----------|----------|-------|------------|-------------|-------------|
| 2009     | p1       | 6     | 0          | 0           |             |
| 2009     | p2       | 6     | 0          | 0           |             |
| 2009     | p3       | 6     | 1,16666667 | 0,40824829  |             |
| 2009     | p4       | 6     | 1,16666667 | 0,40824829  |             |
| 2009     | p5       | 6     | 1,33333333 | 0,51639778  |             |
| 2009     | p6       | 6     | 1,33333333 | 0,81649658  |             |
| 2009     | p7       | 6     | 1,5        | 0,83666003  |             |
| 2009     | p8       | 6     | 1,66666667 | 0,81649658  |             |
| Level    | Level    | N     | Data7      |             |             |
| Cultivar | Care     |       | Mean       | Stand. Dev. |             |
| fianna   | p1       | 9     | 0          | 0           |             |
| fianna   | p2       | 9     | 0          | 0           |             |
| fianna   | p3       | 9     | 1          | 0           |             |
| fianna   | p4       | 9     | 1          | 0           |             |
| fianna   | p5       | 9     | 1,11111111 | 0,33333333  |             |
| fianna   | p6       | 9     | 1          | 0           |             |
| fianna   | p7       | 9     | 1          | 0           |             |
| fianna   | p8       | 9     | 1          | 0           |             |
| irga     | p1       | 9     | 0          | 0           |             |
| irga     | p2       | 9     | 0          | 0           |             |
| irga     | p3       | 9     | 1,33333333 | 0,5         |             |
| irga     | p4       | 9     | 1,22222222 | 0,44095855  |             |
| irga     | p5       | 9     | 1,22222222 | 0,44095855  |             |
| irga     | p6       | 9     | 1,22222222 | 0,66666667  |             |
| irga     | p7       | 9     | 1,33333333 | 0,70710678  |             |
| irga     | p8       | 9     | 1,44444444 | 0,72648316  |             |
| Level    | Level    | Level | N          | Data7       |             |
| Years    | Cultivar | Care  |            | Mean        | Stand. Dev. |
| 2007     | fianna   | p1    | 3          | 0           | 0           |

|      |        |    |   |            |            |
|------|--------|----|---|------------|------------|
| 2007 | fianna | p2 | 3 | 0          | 0          |
| 2007 | fianna | p3 | 3 | 1          | 0          |
| 2007 | fianna | p4 | 3 | 1          | 0          |
| 2007 | fianna | p5 | 3 | 1,33333333 | 0,57735027 |
| 2007 | fianna | p6 | 3 | 1          | 0          |
| 2007 | fianna | p7 | 3 | 1          | 0          |
| 2007 | fianna | p8 | 3 | 1          | 0          |
| 2007 | irga   | p1 | 3 | 0          | 0          |
| 2007 | irga   | p2 | 3 | 0          | 0          |
| 2007 | irga   | p3 | 3 | 1,66666667 | 0,57735027 |
| 2007 | irga   | p4 | 3 | 1,33333333 | 0,57735027 |
| 2007 | irga   | p5 | 3 | 1          | 0          |
| 2007 | irga   | p6 | 3 | 1          | 0          |
| 2007 | irga   | p7 | 3 | 1          | 0          |
| 2007 | irga   | p8 | 3 | 1          | 0          |
| 2008 | fianna | p1 | 3 | 0          | 0          |
| 2008 | fianna | p2 | 3 | 0          | 0          |
| 2008 | fianna | p3 | 3 | 1          | 0          |
| 2008 | fianna | p4 | 3 | 1          | 0          |
| 2008 | fianna | p5 | 3 | 1          | 0          |
| 2008 | fianna | p6 | 3 | 1          | 0          |
| 2008 | fianna | p7 | 3 | 1          | 0          |
| 2008 | fianna | p8 | 3 | 1          | 0          |
| 2008 | irga   | p1 | 3 | 0          | 0          |
| 2008 | irga   | p2 | 3 | 0          | 0          |
| 2008 | irga   | p3 | 3 | 1          | 0          |
| 2008 | irga   | p4 | 3 | 1          | 0          |
| 2008 | irga   | p5 | 3 | 1          | 0          |
| 2008 | irga   | p6 | 3 | 1          | 0          |

|      |        |    |   |            |            |
|------|--------|----|---|------------|------------|
| 2008 | irga   | p7 | 3 | 1          | 0          |
| 2008 | irga   | p8 | 3 | 1          | 0          |
| 2009 | fianna | p1 | 3 | 0          | 0          |
| 2009 | fianna | p2 | 3 | 0          | 0          |
| 2009 | fianna | p3 | 3 | 1          | 0          |
| 2009 | fianna | p4 | 3 | 1          | 0          |
| 2009 | fianna | p5 | 3 | 1          | 0          |
| 2009 | fianna | p6 | 3 | 1          | 0          |
| 2009 | fianna | p7 | 3 | 1          | 0          |
| 2009 | fianna | p8 | 3 | 1          | 0          |
| 2009 | irga   | p1 | 3 | 0          | 0          |
| 2009 | irga   | p2 | 3 | 0          | 0          |
| 2009 | irga   | p3 | 3 | 1,33333333 | 0,57735027 |
| 2009 | irga   | p4 | 3 | 1,33333333 | 0,57735027 |
| 2009 | irga   | p5 | 3 | 1,66666667 | 0,57735027 |
| 2009 | irga   | p6 | 3 | 1,66666667 | 1,15470054 |
| 2009 | irga   | p7 | 3 | 2          | 1          |
| 2009 | irga   | p8 | 3 | 2,33333333 | 0,57735027 |

Table S8. ANOVA table for herbicide damage - 42 days after herbicide application

| 8. Tukey's studentized range (HSD) test for data8                                                                        |          |  |  |  |  |
|--------------------------------------------------------------------------------------------------------------------------|----------|--|--|--|--|
| Data8=herbicide damage_42                                                                                                |          |  |  |  |  |
| Note: This test checks the Type I error of the experimental group, but generally has a higher Type II error than REGWQ.. |          |  |  |  |  |
| Alpha                                                                                                                    | 0,05     |  |  |  |  |
| Degrees of freedom of error                                                                                              | 96       |  |  |  |  |
| Mean square error                                                                                                        | 0,041667 |  |  |  |  |
| Critical value of the studentized range                                                                                  | 3,36669  |  |  |  |  |
| The difference is minimally significant                                                                                  | 0,0992   |  |  |  |  |

|                                                                                                                         |          |    |          |  |  |
|-------------------------------------------------------------------------------------------------------------------------|----------|----|----------|--|--|
| Medium with the same letter do not differ significantly                                                                 |          |    |          |  |  |
| Grouping Tukey                                                                                                          | Mean     | N  | Years    |  |  |
| A                                                                                                                       | 0,79167  | 48 | 2007     |  |  |
| A                                                                                                                       |          |    |          |  |  |
| A                                                                                                                       | 0,79167  | 48 | 2008     |  |  |
| A                                                                                                                       |          |    |          |  |  |
| A                                                                                                                       | 0,79167  | 48 | 2009     |  |  |
| Linear models                                                                                                           |          |    |          |  |  |
| GLM procedure                                                                                                           |          |    |          |  |  |
| 8. Tukey's studentized range (HSD) test for data 8                                                                      |          |    |          |  |  |
|                                                                                                                         |          |    |          |  |  |
| Data8=herbicide damage_42                                                                                               |          |    |          |  |  |
| Note: This test checks the Type I error of the experimental group, but generally has a higher Type II error than REGWQ. |          |    |          |  |  |
| Alpha                                                                                                                   | 0,05     |    |          |  |  |
| Degrees of freedom of error                                                                                             | 96       |    |          |  |  |
| Mean square error                                                                                                       | 0,041667 |    |          |  |  |
| Critical value of the studentized range                                                                                 | 2,80719  |    |          |  |  |
| The difference is minimally significant                                                                                 | 0,0675   |    |          |  |  |
| Średnie z tą samą literą nie                                                                                            |          |    |          |  |  |
| różnią się istotnie.                                                                                                    |          |    |          |  |  |
| Grouping Tukey                                                                                                          | Mean     | N  | Cultivar |  |  |
| A                                                                                                                       | 0,80556  | 72 | fianna   |  |  |
| A                                                                                                                       |          |    |          |  |  |
| A                                                                                                                       | 0,77778  | 72 | irga     |  |  |
| Modele liniowe                                                                                                          |          |    |          |  |  |
| Procedura GLM                                                                                                           |          |    |          |  |  |
| 8. Tukey's studentized range (HSD) test for data8                                                                       |          |    |          |  |  |
|                                                                                                                         |          |    |          |  |  |



| Data8=herbicide damage_42                                                                                               |          |    |       |  |  |
|-------------------------------------------------------------------------------------------------------------------------|----------|----|-------|--|--|
| Note: This test checks the Type I error of the experimental group, but generally has a higher Type II error than REGWQ. |          |    |       |  |  |
| Alpha                                                                                                                   | 0,05     |    |       |  |  |
| Degrees of freedom of error                                                                                             | 96       |    |       |  |  |
| Mean square error                                                                                                       | 0,041667 |    |       |  |  |
| Critical value of the studentized range                                                                                 | 4,3824   |    |       |  |  |
| The difference is minimally significant                                                                                 | 0,2108   |    |       |  |  |
| Medium with the same letter do not differ significantly                                                                 |          |    |       |  |  |
| Grouping Tukey                                                                                                          | Mean     | N  | Care  |  |  |
| A                                                                                                                       | 1        | 18 | p5    |  |  |
| A                                                                                                                       |          |    |       |  |  |
| A                                                                                                                       | 1        | 18 | p6    |  |  |
| A                                                                                                                       |          |    |       |  |  |
| A                                                                                                                       | 1        | 18 | p3    |  |  |
| A                                                                                                                       |          |    |       |  |  |
| A                                                                                                                       | 1        | 18 | p4    |  |  |
| A                                                                                                                       |          |    |       |  |  |
| A                                                                                                                       | 1        | 18 | p7    |  |  |
| A                                                                                                                       |          |    |       |  |  |
| A                                                                                                                       | 1        | 18 | p8    |  |  |
|                                                                                                                         |          |    |       |  |  |
| B                                                                                                                       | 0,16667  | 18 | p1    |  |  |
| B                                                                                                                       |          |    |       |  |  |
| B                                                                                                                       | 0,16667  | 18 | p2    |  |  |
| Linear models<br>GLM procedure                                                                                          |          |    |       |  |  |
| Data8=herbicide damage_42                                                                                               |          |    |       |  |  |
| Level                                                                                                                   | Level    | N  | Data8 |  |  |

| Years | Cultivar |    | Mean       | Stand. Dev. |  |
|-------|----------|----|------------|-------------|--|
| 2007  | fianna   | 24 | 0,75       | 0,44232587  |  |
| 2007  | irga     | 24 | 0,83333333 | 0,38069349  |  |
| 2008  | fianna   | 24 | 0,83333333 | 0,38069349  |  |
| 2008  | irga     | 24 | 0,75       | 0,44232587  |  |
| 2009  | fianna   | 24 | 0,83333333 | 0,38069349  |  |
| Level | irga     | 24 | 0,75       | 0,44232587  |  |
| Years | Level    | N  | Data8      |             |  |
| Years | Care     |    | Mean       | Stand. Dev. |  |
| 2007  | p1       | 6  | 0,16666667 | 0,40824829  |  |
| 2007  | p2       | 6  | 0,16666667 | 0,40824829  |  |
| 2007  | p3       | 6  | 1          | 0           |  |
| 2007  | p4       | 6  | 1          | 0           |  |
| 2007  | p5       | 6  | 1          | 0           |  |
| 2007  | p6       | 6  | 1          | 0           |  |
| 2007  | p7       | 6  | 1          | 0           |  |
| 2007  | p8       | 6  | 1          | 0           |  |
| 2008  | p1       | 6  | 0,16666667 | 0,40824829  |  |
| 2008  | p2       | 6  | 0,16666667 | 0,40824829  |  |
| 2008  | p3       | 6  | 1          | 0           |  |
| 2008  | p4       | 6  | 1          | 0           |  |
| 2008  | p5       | 6  | 1          | 0           |  |
| 2008  | p6       | 6  | 1          | 0           |  |
| 2008  | p7       | 6  | 1          | 0           |  |
| 2008  | p8       | 6  | 1          | 0           |  |
| 2009  | p1       | 6  | 0,16666667 | 0,40824829  |  |
| 2009  | p2       | 6  | 0,16666667 | 0,40824829  |  |
| 2009  | p3       | 6  | 1          | 0           |  |
| 2009  | p4       | 6  | 1          | 0           |  |

|          |          |       |            |             |             |
|----------|----------|-------|------------|-------------|-------------|
| 2009     | p5       | 6     | 1          | 0           |             |
| 2009     | p6       | 6     | 1          | 0           |             |
| 2009     | p7       | 6     | 1          | 0           |             |
| 2009     | p8       | 6     | 1          | 0           |             |
| Level    | Level    | N     | Data8      |             |             |
| Cultivar | Care     |       | Mean       | Stand. Dev. |             |
| fianna   | p1       | 9     | 0,22222222 | 0,44095855  |             |
| fianna   | p2       | 9     | 0,22222222 | 0,44095855  |             |
| fianna   | p3       | 9     | 1          | 0           |             |
| fianna   | p4       | 9     | 1          | 0           |             |
| fianna   | p5       | 9     | 1          | 0           |             |
| fianna   | p6       | 9     | 1          | 0           |             |
| fianna   | p7       | 9     | 1          | 0           |             |
| fianna   | p8       | 9     | 1          | 0           |             |
| irga     | p1       | 9     | 0,11111111 | 0,33333333  |             |
| irga     | p2       | 9     | 0,11111111 | 0,33333333  |             |
| irga     | p3       | 9     | 1          | 0           |             |
| irga     | p4       | 9     | 1          | 0           |             |
| irga     | p5       | 9     | 1          | 0           |             |
| irga     | p6       | 9     | 1          | 0           |             |
| irga     | p7       | 9     | 1          | 0           |             |
| irga     | p8       | 9     | 1          | 0           |             |
| Level    | Level    | Level | N          | Data6       |             |
| Years    | Cultivar | Care  |            | Mean        | Stand. Dev. |
| 2007     | fianna   | p1    | 3          | 0           | 0           |
| 2007     | fianna   | p2    | 3          | 0           | 0           |
| 2007     | fianna   | p3    | 3          | 1           | 0           |
| 2007     | fianna   | p4    | 3          | 1           | 0           |
| 2007     | fianna   | p5    | 3          | 1           | 0           |

|      |        |    |   |            |            |
|------|--------|----|---|------------|------------|
| 2007 | fianna | p6 | 3 | 1          | 0          |
| 2007 | fianna | p7 | 3 | 1          | 0          |
| 2007 | fianna | p8 | 3 | 1          | 0          |
| 2007 | irga   | p1 | 3 | 0,33333333 | 0,57735027 |
| 2007 | irga   | p2 | 3 | 0,33333333 | 0,57735027 |
| 2007 | irga   | p3 | 3 | 1          | 0          |
| 2007 | irga   | p4 | 3 | 1          | 0          |
| 2007 | irga   | p5 | 3 | 1          | 0          |
| 2007 | irga   | p6 | 3 | 1          | 0          |
| 2007 | irga   | p7 | 3 | 1          | 0          |
| 2007 | irga   | p8 | 3 | 1          | 0          |
| 2008 | fianna | p1 | 3 | 0,33333333 | 0,57735027 |
| 2008 | fianna | p2 | 3 | 0,33333333 | 0,57735027 |
| 2008 | fianna | p3 | 3 | 1          | 0          |
| 2008 | fianna | p4 | 3 | 1          | 0          |
| 2008 | fianna | p5 | 3 | 1          | 0          |
| 2008 | fianna | p6 | 3 | 1          | 0          |
| 2008 | fianna | p7 | 3 | 1          | 0          |
| 2008 | fianna | p8 | 3 | 1          | 0          |
| 2008 | irga   | p1 | 3 | 0          | 0          |
| 2008 | irga   | p2 | 3 | 0          | 0          |
| 2008 | irga   | p3 | 3 | 1          | 0          |
| 2008 | irga   | p4 | 3 | 1          | 0          |
| 2008 | irga   | p5 | 3 | 1          | 0          |
| 2008 | irga   | p6 | 3 | 1          | 0          |
| 2008 | irga   | p7 | 3 | 1          | 0          |
| 2008 | irga   | p8 | 3 | 1          | 0          |
| 2009 | fianna | p1 | 3 | 0,33333333 | 0,57735027 |
| 2009 | fianna | p2 | 3 | 0,33333333 | 0,57735027 |

|      |        |    |   |   |   |
|------|--------|----|---|---|---|
| 2009 | fianna | p3 | 3 | 1 | 0 |
| 2009 | fianna | p4 | 3 | 1 | 0 |
| 2009 | fianna | p5 | 3 | 1 | 0 |
| 2009 | fianna | p6 | 3 | 1 | 0 |
| 2009 | fianna | p7 | 3 | 1 | 0 |
| 2009 | fianna | p8 | 3 | 1 | 0 |
| 2009 | irga   | p1 | 3 | 0 | 0 |
| 2009 | irga   | p2 | 3 | 0 | 0 |
| 2009 | irga   | p3 | 3 | 1 | 0 |
| 2009 | irga   | p4 | 3 | 1 | 0 |
| 2009 | irga   | p5 | 3 | 1 | 0 |
| 2009 | irga   | p6 | 3 | 1 | 0 |
| 2009 | irga   | p7 | 3 | 1 | 0 |
| 2009 | irga   | p8 | 3 | 1 | 0 |

Table S9. Table Analysis of variance ANOVA of number of monocotyledonous weeds before short circuit of potato rows

| 9. Tukey's studentized range (HSD) test for data9                                                                       |         |   |       |  |  |
|-------------------------------------------------------------------------------------------------------------------------|---------|---|-------|--|--|
| Data9=Number of monocotyledonous weeds before short circuit                                                             |         |   |       |  |  |
| Note: This test checks the Type I error of the experimental group, but generally has a higher Type II error than REGWQ. |         |   |       |  |  |
| Alpha                                                                                                                   | 0,05    |   |       |  |  |
| Degrees of freedom of error                                                                                             | 96      |   |       |  |  |
| Mean square error                                                                                                       | 10,875  |   |       |  |  |
| Critical value of the studentized range                                                                                 | 3,36669 |   |       |  |  |
| The difference is minimally significant                                                                                 | 1,6025  |   |       |  |  |
| Medium with the same letter do not differ significantly                                                                 |         |   |       |  |  |
| Grouping Tukey                                                                                                          | Mean    | N | Years |  |  |

|                                                                                                                        |         |    |          |  |  |
|------------------------------------------------------------------------------------------------------------------------|---------|----|----------|--|--|
| A                                                                                                                      | 10,1875 | 48 | 2008     |  |  |
|                                                                                                                        |         |    |          |  |  |
| B                                                                                                                      | 6,8958  | 48 | 2007     |  |  |
|                                                                                                                        |         |    |          |  |  |
| C                                                                                                                      | 3,4375  | 48 | 2009     |  |  |
| Linear models GLM procedure                                                                                            |         |    |          |  |  |
| 9. Tukey's studentized range (HSD) test for data9                                                                      |         |    |          |  |  |
|                                                                                                                        |         |    |          |  |  |
| Data9=Number of monocotyledonous weeds before short circuit                                                            |         |    |          |  |  |
| Note: This test checks the Type I error of the experimental group, but generally has a higher Type II error than REGWQ |         |    |          |  |  |
| Alpha                                                                                                                  | 0,05    |    |          |  |  |
| Degrees of freedom of error                                                                                            | 96      |    |          |  |  |
| Mean square error                                                                                                      | 10,875  |    |          |  |  |
| Critical value of the studentized range                                                                                | 2,80719 |    |          |  |  |
| The difference is minimally significant                                                                                | 1,091   |    |          |  |  |
| Medium with the same letter do not differ significantly                                                                |         |    |          |  |  |
| Grouping Tukey                                                                                                         | Mean    | N  | Cultivar |  |  |
| A                                                                                                                      | 7,4722  | 72 | irga     |  |  |
|                                                                                                                        |         |    |          |  |  |
| B                                                                                                                      | 6,2083  | 72 | fianna   |  |  |
| Linear models GLM procedure                                                                                            |         |    |          |  |  |
| 9. Tukey's studentized range (HSD) test for data9                                                                      |         |    |          |  |  |
| Data9=Number of monocotyledonous weeds before short circuit                                                            |         |    |          |  |  |
| Note: This test checks the Type I error of the experimental group, but generally has a higher Type II error than REGWQ |         |    |          |  |  |
| Alpha                                                                                                                  | 0,05    |    |          |  |  |
| Degrees of freedom of error                                                                                            | 96      |    |          |  |  |
| Mean square error                                                                                                      | 10,875  |    |          |  |  |

|                                                             |        |        |            |             |  |
|-------------------------------------------------------------|--------|--------|------------|-------------|--|
| Critical value of the studentized range                     | 4,3824 |        |            |             |  |
| The difference is minimally significant                     | 3,4064 |        |            |             |  |
| Medium with the same letter do not differ significantly     |        |        |            |             |  |
| Grouping Tukey                                              |        | Mean   | N          | Care        |  |
|                                                             | A      | 15,889 | 18         | p1          |  |
|                                                             |        |        |            |             |  |
|                                                             | B      | 7,167  | 18         | p2          |  |
|                                                             | B      |        |            |             |  |
| C                                                           | B      | 6,778  | 18         | p6          |  |
| C                                                           | B      |        |            |             |  |
| C                                                           | B      | 6,444  | 18         | p5          |  |
| C                                                           | B      |        |            |             |  |
| C                                                           | B      | 5,944  | 18         | p3          |  |
| C                                                           | B      |        |            |             |  |
| C                                                           | B      | 5      | 18         | p7          |  |
| C                                                           | B      |        |            |             |  |
| C                                                           | B      | 3,778  | 18         | p4          |  |
| C                                                           |        |        |            |             |  |
| C                                                           |        | 3,722  | 18         | p8          |  |
| Linear models GLM procedure                                 |        |        |            |             |  |
| Data9=Number of monocotyledonous weeds before short circuit |        |        |            |             |  |
| Level                                                       | Level  | N      | Data9      |             |  |
| years                                                       | Care   |        | Mean       | Stand. Dev. |  |
| 2007                                                        | fianna | 24     | 6,2916667  | 5,22934169  |  |
| 2007                                                        | irga   | 24     | 7,5        | 3,85610752  |  |
| 2008                                                        | fianna | 24     | 9,5833333  | 8,79187702  |  |
| 2008                                                        | irga   | 24     | 10,7916667 | 7,92891882  |  |
| 2009                                                        | fianna | 24     | 2,75       | 2,21162934  |  |
| 2009                                                        | irga   | 24     | 4,125      | 4,78505372  |  |

| Level    | Level | N | Data9      |             |  |
|----------|-------|---|------------|-------------|--|
| years    | care  |   | Mean       | Stand. Dev. |  |
| 2007     | p1    | 6 | 15,3333333 | 4,0824829   |  |
| 2007     | p2    | 6 | 2,8333333  | 1,94079022  |  |
| 2007     | p3    | 6 | 9          | 2,44948974  |  |
| 2007     | p4    | 6 | 6,3333333  | 2,87518115  |  |
| 2007     | p5    | 6 | 4,8333333  | 1,94079022  |  |
| 2007     | p6    | 6 | 6,8333333  | 2,99443929  |  |
| 2007     | p7    | 6 | 5,1666667  | 4,57893729  |  |
| 2007     | p8    | 6 | 4,8333333  | 2,13697606  |  |
| 2008     | p1    | 6 | 26,8333333 | 6,5243135   |  |
| 2008     | p2    | 6 | 10,3333333 | 4,45720391  |  |
| 2008     | p3    | 6 | 4          | 2,28035085  |  |
| 2008     | p4    | 6 | 1          | 1,26491106  |  |
| 2008     | p5    | 6 | 13,1666667 | 4,16733328  |  |
| 2008     | p6    | 6 | 11,5       | 3,61939221  |  |
| 2008     | p7    | 6 | 9,1666667  | 4,21505239  |  |
| 2008     | p8    | 6 | 5,5        | 3,27108545  |  |
| 2009     | p1    | 6 | 5,5        | 4,59347363  |  |
| 2009     | p2    | 6 | 8,3333333  | 6,05530071  |  |
| 2009     | p3    | 6 | 4,8333333  | 1,94079022  |  |
| 2009     | p4    | 6 | 4          | 2,19089023  |  |
| 2009     | p5    | 6 | 1,3333333  | 0,81649658  |  |
| 2009     | p6    | 6 | 2          | 1,67332005  |  |
| 2009     | p7    | 6 | 0,6666667  | 0,81649658  |  |
| 2009     | p8    | 6 | 0,8333333  | 0,40824829  |  |
| Level    | Level | N | Data9      |             |  |
| Cultivar | Care  |   | Mean       | Stand. Dev. |  |
| fianna   | p1    | 9 | 16,7777778 | 11,155467   |  |



|        |          |       |           |            |             |
|--------|----------|-------|-----------|------------|-------------|
| fianna | p2       | 9     | 4,8888889 | 4,044887   |             |
| fianna | p3       | 9     | 5,5555556 | 3,4318767  |             |
| fianna | p4       | 9     | 3,6666667 | 2,7386128  |             |
| fianna | p5       | 9     | 5,2222222 | 4,5215533  |             |
| fianna | p6       | 9     | 5,5555556 | 4,1566546  |             |
| fianna | p7       | 9     | 4         | 4,9749372  |             |
| fianna | p8       | 9     | 4         | 3,8078866  |             |
| irga   | p1       | 9     | 15        | 9,7467943  |             |
| irga   | p2       | 9     | 9,4444444 | 5,6813535  |             |
| irga   | p3       | 9     | 6,3333333 | 2,8284271  |             |
| irga   | p4       | 9     | 3,8888889 | 3,5158372  |             |
| irga   | p5       | 9     | 7,6666667 | 6,726812   |             |
| irga   | p6       | 9     | 8         | 5,3619026  |             |
| irga   | p7       | 9     | 6         | 4,9749372  |             |
| irga   | p8       | 9     | 3,4444444 | 2,1278576  |             |
| Level  | Level    | Level | N         | Data9      |             |
| years  | Cultivar | Care  |           | Mean       | Stand. Dev. |
| 2007   | fianna   | p1    | 3         | 16,6666667 | 4,163332    |
| 2007   | fianna   | p2    | 3         | 1,6666667  | 2,081666    |
| 2007   | fianna   | p3    | 3         | 8,3333333  | 3,51188458  |
| 2007   | fianna   | p4    | 3         | 5,3333333  | 3,51188458  |
| 2007   | fianna   | p5    | 3         | 3,6666667  | 1,52752523  |
| 2007   | fianna   | p6    | 3         | 7          | 3,60555128  |
| 2007   | fianna   | p7    | 3         | 2,6666667  | 3,05505046  |
| 2007   | fianna   | p8    | 3         | 5          | 3           |
| 2007   | irga     | p1    | 3         | 14         | 4,35889894  |
| 2007   | irga     | p2    | 3         | 4          | 1           |
| 2007   | irga     | p3    | 3         | 9,6666667  | 1,15470054  |
| 2007   | irga     | p4    | 3         | 7,3333333  | 2,30940108  |

|      |        |    |   |            |            |
|------|--------|----|---|------------|------------|
| 2007 | irga   | p5 | 3 | 6          | 1,73205081 |
| 2007 | irga   | p6 | 3 | 6,6666667  | 3,05505046 |
| 2007 | irga   | p7 | 3 | 7,6666667  | 4,93288286 |
| 2007 | irga   | p8 | 3 | 4,6666667  | 1,52752523 |
| 2008 | fianna | p1 | 3 | 28,6666667 | 7,57187779 |
| 2008 | fianna | p2 | 3 | 8,3333333  | 5,03322296 |
| 2008 | fianna | p3 | 3 | 4,3333333  | 3,21455025 |
| 2008 | fianna | p4 | 3 | 1,3333333  | 1,52752523 |
| 2008 | fianna | p5 | 3 | 10,3333333 | 4,04145188 |
| 2008 | fianna | p6 | 3 | 8,6666667  | 2,51661148 |
| 2008 | fianna | p7 | 3 | 8,6666667  | 6,11010093 |
| 2008 | fianna | p8 | 3 | 6,3333333  | 4,72581563 |
| 2008 | irga   | p1 | 3 | 25         | 6,244998   |
| 2008 | irga   | p2 | 3 | 12,3333333 | 3,51188458 |
| 2008 | irga   | p3 | 3 | 3,6666667  | 1,52752523 |
| 2008 | irga   | p4 | 3 | 0,6666667  | 1,15470054 |
| 2008 | irga   | p5 | 3 | 16         | 1,73205081 |
| 2008 | irga   | p6 | 3 | 14,3333333 | 1,52752523 |
| 2008 | irga   | p7 | 3 | 9,6666667  | 2,51661148 |
| 2008 | irga   | p8 | 3 | 4,6666667  | 1,52752523 |
| 2009 | fianna | p1 | 3 | 5          | 1,73205081 |
| 2009 | fianna | p2 | 3 | 4,6666667  | 1,52752523 |
| 2009 | fianna | p3 | 3 | 4          | 2,64575131 |
| 2009 | fianna | p4 | 3 | 4,3333333  | 1,52752523 |
| 2009 | fianna | p5 | 3 | 1,6666667  | 1,15470054 |
| 2009 | fianna | p6 | 3 | 1          | 1          |
| 2009 | fianna | p7 | 3 | 0,6666667  | 0,57735027 |
| 2009 | fianna | p8 | 3 | 0,6666667  | 0,57735027 |
| 2009 | irga   | p1 | 3 | 6          | 7          |

|      |      |    |   |           |            |
|------|------|----|---|-----------|------------|
| 2009 | irga | p2 | 3 | 12        | 7          |
| 2009 | irga | p3 | 3 | 5,6666667 | 0,57735027 |
| 2009 | irga | p4 | 3 | 3,6666667 | 3,05505046 |
| 2009 | irga | p5 | 3 | 1         | 0          |
| 2009 | irga | p6 | 3 | 3         | 1,73205081 |
| 2009 | irga | p7 | 3 | 0,6666667 | 1,15470054 |
| 2009 | irga | p8 | 3 | 1         | 0          |

Table S10. Table Analysis of variance ANOVA of number of dicotyledonous weeds before short circuit of potato rows

| 10. Tukey's studentized range (HSD) test for data10                                                                    |          |    |       |  |  |
|------------------------------------------------------------------------------------------------------------------------|----------|----|-------|--|--|
| Data10= Number of dicotyledonous weeds before short circuit of potato rows                                             |          |    |       |  |  |
| Note: This test checks the Type I error of the experimental group, but generally has a higher Type II error than REGWQ |          |    |       |  |  |
| Alpha                                                                                                                  | 0,05     |    |       |  |  |
| Degrees of freedom of error                                                                                            | 96       |    |       |  |  |
| Mean square error                                                                                                      | 14,59028 |    |       |  |  |
| Critical value of the studentized range                                                                                | 3,36669  |    |       |  |  |
| The difference is minimally significant                                                                                | 1,8562   |    |       |  |  |
| Medium with the same letter do not differ significantly                                                                |          |    |       |  |  |
| Grouping Tukey                                                                                                         | Mean     | N  | Years |  |  |
| A                                                                                                                      | 11,75    | 48 | 2009  |  |  |
|                                                                                                                        |          |    |       |  |  |
| B                                                                                                                      | 2,3542   | 48 | 2007  |  |  |
| B                                                                                                                      |          |    |       |  |  |
| B                                                                                                                      | 1,6458   | 48 | 2008  |  |  |
| Linear models GLM procedure                                                                                            |          |    |       |  |  |

|                                                                                                                        |          |    |          |  |  |
|------------------------------------------------------------------------------------------------------------------------|----------|----|----------|--|--|
| 10. Tukey's studentized range (HSD) test for data10                                                                    |          |    |          |  |  |
| Data10= Number of dicotyledonous weeds before short circuit of potato rows                                             |          |    |          |  |  |
| Note: This test checks the Type I error of the experimental group, but generally has a higher Type II error than REGWQ |          |    |          |  |  |
| Alpha                                                                                                                  | 0,05     |    |          |  |  |
| Degrees of freedom of error                                                                                            | 96       |    |          |  |  |
| Mean square error                                                                                                      | 14,59028 |    |          |  |  |
| Critical value of the studentized range                                                                                | 2,80719  |    |          |  |  |
| The difference is minimally significant                                                                                | 1,2637   |    |          |  |  |
| Medium with the same letter do not differ significantly                                                                |          |    |          |  |  |
| Grouping Tukey                                                                                                         | Mean     | N  | Cultivar |  |  |
| A                                                                                                                      | 5,375    | 72 | fianna   |  |  |
| A                                                                                                                      |          |    |          |  |  |
| A                                                                                                                      | 5,125    | 72 | irga     |  |  |
| Linear models GLM procedure                                                                                            |          |    |          |  |  |
| 10. Tukey's studentized range (HSD) test for data10                                                                    |          |    |          |  |  |
|                                                                                                                        |          |    |          |  |  |
| Data10= Number of dicotyledonous weeds before short circuit of potato rows                                             |          |    |          |  |  |
| Note: This test checks the Type I error of the experimental group, but generally has a higher Type II error than REGWQ |          |    |          |  |  |
| Alpha                                                                                                                  | 0,05     |    |          |  |  |
| Degrees of freedom of error                                                                                            | 96       |    |          |  |  |
| Mean square error                                                                                                      | 14,59028 |    |          |  |  |
| Critical value of the studentized range                                                                                | 4,3824   |    |          |  |  |
| The difference is minimally significant                                                                                | 3,9456   |    |          |  |  |
| Medium with the same letter do not differ significantly                                                                |          |    |          |  |  |
| Grouping Tukey                                                                                                         | Mean     | N  | Care     |  |  |
| A                                                                                                                      | 17,389   | 18 | p1       |  |  |
|                                                                                                                        |          |    |          |  |  |

|                                                                            |          |    |            |             |  |
|----------------------------------------------------------------------------|----------|----|------------|-------------|--|
| B                                                                          | 9,556    | 18 | p2         |             |  |
|                                                                            |          |    |            |             |  |
| C                                                                          | 4,556    | 18 | p3         |             |  |
| C                                                                          |          |    |            |             |  |
| C                                                                          | 3,056    | 18 | p6         |             |  |
| C                                                                          |          |    |            |             |  |
| C                                                                          | 2,222    | 18 | p7         |             |  |
| C                                                                          |          |    |            |             |  |
| C                                                                          | 2,056    | 18 | p4         |             |  |
| C                                                                          |          |    |            |             |  |
| C                                                                          | 1,833    | 18 | p5         |             |  |
| C                                                                          |          |    |            |             |  |
| C                                                                          | 1,333    | 18 | p8         |             |  |
| Linear models GLM procedure                                                |          |    |            |             |  |
| Data10= Number of dicotyledonous weeds before short circuit of potato rows |          |    |            |             |  |
| Level                                                                      | Level    | N  | Data10     |             |  |
| Years                                                                      | Cultivar |    | Mean       | Stand. Dev. |  |
| 2007                                                                       | fianna   | 24 | 3,4166667  | 3,2291696   |  |
| 2007                                                                       | irga     | 24 | 1,2916667  | 1,9219367   |  |
| 2008                                                                       | fianna   | 24 | 2,1666667  | 3,088079    |  |
| 2008                                                                       | irga     | 24 | 1,125      | 1,8252457   |  |
| 2009                                                                       | fianna   | 24 | 10,5416667 | 12,3216994  |  |
| 2009                                                                       | irga     | 24 | 12,9583333 | 15,7465777  |  |
| Level                                                                      | Level    | N  | Data10     |             |  |
| Years                                                                      | Care     |    | Mean       | Stand. Dev. |  |
| 2007                                                                       | p1       | 6  | 6,3333333  | 4,2739521   |  |
| 2007                                                                       | p2       | 6  | 0,5        | 0,83666     |  |
| 2007                                                                       | p3       | 6  | 2          | 2,607681    |  |
| 2007                                                                       | p4       | 6  | 1,1666667  | 1,9407902   |  |

| 2007     | p5    | 6 | 3,6666667  | 2,2509257   |  |
|----------|-------|---|------------|-------------|--|
| 2007     | p6    | 6 | 2,5        | 2,0736441   |  |
| 2007     | p7    | 6 | 2          | 1,8973666   |  |
| 2007     | p8    | 6 | 0,6666667  | 1,6329932   |  |
| 2008     | p1    | 6 | 7          | 3,7416574   |  |
| 2008     | p2    | 6 | 2,1666667  | 0,7527727   |  |
| 2008     | p3    | 6 | 0          | 0           |  |
| 2008     | p4    | 6 | 0          | 0           |  |
| 2008     | p5    | 6 | 1          | 0,8944272   |  |
| 2008     | p6    | 6 | 1,1666667  | 1,3291601   |  |
| 2008     | p7    | 6 | 1,1666667  | 0,7527727   |  |
| 2008     | p8    | 6 | 0,6666667  | 0,8164966   |  |
| 2009     | p1    | 6 | 38,8333333 | 12,8594971  |  |
| 2009     | p2    | 6 | 26         | 7,2387844   |  |
| 2009     | p3    | 6 | 11,6666667 | 5,8878406   |  |
| 2009     | p4    | 6 | 5          | 3,3466401   |  |
| 2009     | p5    | 6 | 0,8333333  | 0,7527727   |  |
| 2009     | p6    | 6 | 5,5        | 5,7532599   |  |
| 2009     | p7    | 6 | 3,5        | 1,7606817   |  |
| 2009     | p8    | 6 | 2,6666667  | 1,8618987   |  |
| Level    | Level | N | Data10     |             |  |
| Cultivar | Care  |   | Mean       | Stand. Dev. |  |
| fianna   | p1    | 9 | 18,1111111 | 14,2517056  |  |
| fianna   | p2    | 9 | 8,1111111  | 10,2157286  |  |
| fianna   | p3    | 9 | 4,2222222  | 5,0194068   |  |
| fianna   | p4    | 9 | 2,1111111  | 2,8037673   |  |
| fianna   | p5    | 9 | 2,2222222  | 1,9220938   |  |
| fianna   | p6    | 9 | 4,2222222  | 4,9441323   |  |
| fianna   | p7    | 9 | 2,3333333  | 1,4142136   |  |

|        |          |       |            |            |             |
|--------|----------|-------|------------|------------|-------------|
| fianna | p8       | 9     | 1,6666667  | 1,6583124  |             |
| irga   | p1       | 9     | 16,6666667 | 20,8985645 |             |
| irga   | p2       | 9     | 11         | 15,1575064 |             |
| irga   | p3       | 9     | 4,8888889  | 7,6720995  |             |
| irga   | p4       | 9     | 2          | 3,4278273  |             |
| irga   | p5       | 9     | 1,4444444  | 1,9436506  |             |
| irga   | p6       | 9     | 1,8888889  | 2,0883273  |             |
| irga   | p7       | 9     | 2,1111111  | 2,1473498  |             |
| irga   | p8       | 9     | 1          | 1,8027756  |             |
| Level  | Level    | Level | N          | Data10     |             |
| Years  | Cultivar | Care  |            | Mean       | Stand. Dev. |
| 2007   | fianna   | p1    | 3          | 10         | 1           |
| 2007   | fianna   | p2    | 3          | 1          | 1           |
| 2007   | fianna   | p3    | 3          | 3,6666667  | 2,8867513   |
| 2007   | fianna   | p4    | 3          | 2          | 2,6457513   |
| 2007   | fianna   | p5    | 3          | 4,3333333  | 1,5275252   |
| 2007   | fianna   | p6    | 3          | 2,3333333  | 1,5275252   |
| 2007   | fianna   | p7    | 3          | 2,6666667  | 2,3094011   |
| 2007   | fianna   | p8    | 3          | 1,3333333  | 2,3094011   |
| 2007   | irga     | p1    | 3          | 2,6666667  | 2,081666    |
| 2007   | irga     | p2    | 3          | 0          | 0           |
| 2007   | irga     | p3    | 3          | 0,3333333  | 0,5773503   |
| 2007   | irga     | p4    | 3          | 0,3333333  | 0,5773503   |
| 2007   | irga     | p5    | 3          | 3          | 3           |
| 2007   | irga     | p6    | 3          | 2,6666667  | 2,8867513   |
| 2007   | irga     | p7    | 3          | 1,3333333  | 1,5275252   |
| 2007   | irga     | p8    | 3          | 0          | 0           |
| 2008   | fianna   | p1    | 3          | 9          | 4,3588989   |
| 2008   | fianna   | p2    | 3          | 2          | 1           |

|      |        |    |   |            |            |
|------|--------|----|---|------------|------------|
| 2008 | fianna | p3 | 3 | 0          | 0          |
| 2008 | fianna | p4 | 3 | 0          | 0          |
| 2008 | fianna | p5 | 3 | 1,3333333  | 1,1547005  |
| 2008 | fianna | p6 | 3 | 2,3333333  | 0,5773503  |
| 2008 | fianna | p7 | 3 | 1,3333333  | 0,5773503  |
| 2008 | fianna | p8 | 3 | 1,3333333  | 0,5773503  |
| 2008 | irga   | p1 | 3 | 5          | 2          |
| 2008 | irga   | p2 | 3 | 2,3333333  | 0,5773503  |
| 2008 | irga   | p3 | 3 | 0          | 0          |
| 2008 | irga   | p4 | 3 | 0          | 0          |
| 2008 | irga   | p5 | 3 | 0,6666667  | 0,5773503  |
| 2008 | irga   | p6 | 3 | 0          | 0          |
| 2008 | irga   | p7 | 3 | 1          | 1          |
| 2008 | irga   | p8 | 3 | 0          | 0          |
| 2009 | fianna | p1 | 3 | 35,3333333 | 11,1504858 |
| 2009 | fianna | p2 | 3 | 21,3333333 | 4,6188022  |
| 2009 | fianna | p3 | 3 | 9          | 5,5677644  |
| 2009 | fianna | p4 | 3 | 4,3333333  | 3,2145503  |
| 2009 | fianna | p5 | 3 | 1          | 1          |
| 2009 | fianna | p6 | 3 | 8          | 7,9372539  |
| 2009 | fianna | p7 | 3 | 3          | 0          |
| 2009 | fianna | p8 | 3 | 2,3333333  | 2,081666   |
| 2009 | irga   | p1 | 3 | 42,3333333 | 15,8850034 |
| 2009 | irga   | p2 | 3 | 30,6666667 | 6,6583281  |
| 2009 | irga   | p3 | 3 | 14,3333333 | 5,8594653  |
| 2009 | irga   | p4 | 3 | 5,6666667  | 4,0414519  |
| 2009 | irga   | p5 | 3 | 0,6666667  | 0,5773503  |
| 2009 | irga   | p6 | 3 | 3          | 1          |
| 2009 | irga   | p7 | 3 | 4          | 2,6457513  |



|      |      |    |   |   |   |
|------|------|----|---|---|---|
| 2009 | irga | p8 | 3 | 3 | 2 |
|------|------|----|---|---|---|

Table S11. Table Analysis of variance ANOVA of number of monocotyledonous and dicotyledonous weeds before short circuit of potato rows

| 11. Tukey's studentized range (HSD) test for data11                                                                    |          |    |       |  |  |
|------------------------------------------------------------------------------------------------------------------------|----------|----|-------|--|--|
| Data11=Number of monocotyledonous and dicotyledonous weeds before short circuit of potato rows                         |          |    |       |  |  |
| Note: This test checks the Type I error of the experimental group, but generally has a higher Type II error than REGWQ |          |    |       |  |  |
| Alpha                                                                                                                  | 0,05     |    |       |  |  |
| Degrees of freedom of error                                                                                            | 96       |    |       |  |  |
| Mean square error                                                                                                      | 29,22222 |    |       |  |  |
| Critical value of the studentized range                                                                                | 3,36669  |    |       |  |  |
| The difference is minimally significant                                                                                | 2,6269   |    |       |  |  |
| Medium with the same letter do not differ significantly                                                                |          |    |       |  |  |
| Grouping Tukey                                                                                                         | Mean     | N  | Years |  |  |
| A                                                                                                                      | 15,188   | 48 | 2009  |  |  |
|                                                                                                                        |          |    |       |  |  |
| B                                                                                                                      | 11,833   | 48 | 2008  |  |  |
| B                                                                                                                      |          |    |       |  |  |
| B                                                                                                                      | 9,229    | 48 | 2007  |  |  |
| Linear models GLM procedure                                                                                            |          |    |       |  |  |
| 11. Tukey's studentized range (HSD) test for data11                                                                    |          |    |       |  |  |
| Data11= Number of monocotyledonous and dicotyledonous weeds before short circuit of potato rows                        |          |    |       |  |  |
| Note: This test checks the Type I error of the experimental group, but generally has a higher Type II error than REGWQ |          |    |       |  |  |
| Alpha                                                                                                                  | 0,05     |    |       |  |  |
| Degrees of freedom of error                                                                                            | 96       |    |       |  |  |
| Mean square error                                                                                                      | 29,22222 |    |       |  |  |
| Critical value of the studentized range                                                                                | 2,80719  |    |       |  |  |

|                                                                                                                        |          |    |          |  |  |
|------------------------------------------------------------------------------------------------------------------------|----------|----|----------|--|--|
| The difference is minimally significant                                                                                | 1,7884   |    |          |  |  |
| Medium with the same letter do not differ significantly                                                                |          |    |          |  |  |
| Grouping Tukey                                                                                                         | Mean     | N  | Cultivar |  |  |
| A                                                                                                                      | 12,5972  | 72 | irga     |  |  |
| A                                                                                                                      |          |    |          |  |  |
| A                                                                                                                      | 11,5694  | 72 | fianna   |  |  |
| Linear models GLM procedure                                                                                            |          |    |          |  |  |
| 11. Tukey's studentized range (HSD) test for data11                                                                    |          |    |          |  |  |
| Data11= Number of monocotyledonous and dicotyledonous weeds before short circuit of potato rows                        |          |    |          |  |  |
| Note: This test checks the Type I error of the experimental group, but generally has a higher Type II error than REGWQ |          |    |          |  |  |
| Alpha                                                                                                                  | 0,05     |    |          |  |  |
| Degrees of freedom of error                                                                                            | 96       |    |          |  |  |
| Mean square error                                                                                                      | 29,22222 |    |          |  |  |
| Critical value of the studentized range                                                                                | 4,3824   |    |          |  |  |
| The difference is minimally significant                                                                                | 5,5838   |    |          |  |  |
| Medium with the same letter do not differ significantly                                                                |          |    |          |  |  |
| Grouping Tukey                                                                                                         | Mean     | N  | Care     |  |  |
| A                                                                                                                      | 33,222   | 18 | p1       |  |  |
|                                                                                                                        |          |    |          |  |  |
| B                                                                                                                      | 16,722   | 18 | p2       |  |  |
|                                                                                                                        |          |    |          |  |  |
| C                                                                                                                      | 10,5     | 18 | p3       |  |  |
| C                                                                                                                      |          |    |          |  |  |
| C                                                                                                                      | 9,833    | 18 | p6       |  |  |
| C                                                                                                                      |          |    |          |  |  |
| C                                                                                                                      | 8,278    | 18 | p5       |  |  |
| C                                                                                                                      |          |    |          |  |  |
| C                                                                                                                      | 7,222    | 18 | p7       |  |  |

|                                                                                                 |          |    |            |             |  |
|-------------------------------------------------------------------------------------------------|----------|----|------------|-------------|--|
| C                                                                                               |          |    |            |             |  |
| C                                                                                               | 5,833    | 18 | p4         |             |  |
| C                                                                                               |          |    |            |             |  |
| C                                                                                               | 5,056    | 18 | p8         |             |  |
| Linear models GLM procedure                                                                     |          |    |            |             |  |
| Data11= Number of monocotyledonous and dicotyledonous weeds before short circuit of potato rows |          |    |            |             |  |
| Level                                                                                           | Level    | N  | Data11     |             |  |
| Years                                                                                           | Cultivar |    | Mean       | Stand. Dev. |  |
| 2007                                                                                            | fianna   | 24 | 9,6666667  | 7,2989974   |  |
| 2007                                                                                            | irga     | 24 | 8,7916667  | 4,8452502   |  |
| 2008                                                                                            | fianna   | 24 | 11,75      | 11,5051973  |  |
| 2008                                                                                            | irga     | 24 | 11,9166667 | 9,361887    |  |
| 2009                                                                                            | fianna   | 24 | 13,2916667 | 13,6269527  |  |
| 2009                                                                                            | irga     | 24 | 17,0833333 | 19,1468391  |  |
| Level                                                                                           | Level    | N  | Data11     |             |  |
| Years                                                                                           | Care     |    | Mean       | Stand. Dev. |  |
| 2007                                                                                            | p1       | 6  | 21,5       | 7,0356236   |  |
| 2007                                                                                            | p2       | 6  | 3,3333333  | 1,8618987   |  |
| 2007                                                                                            | p3       | 6  | 11         | 2           |  |
| 2007                                                                                            | p4       | 6  | 7,5        | 1,6431677   |  |
| 2007                                                                                            | p5       | 6  | 8,5        | 2,9495762   |  |
| 2007                                                                                            | p6       | 6  | 9,3333333  | 3,3862467   |  |
| 2007                                                                                            | p7       | 6  | 7,1666667  | 4,4907312   |  |
| 2007                                                                                            | p8       | 6  | 5,5        | 1,6431677   |  |
| 2008                                                                                            | p1       | 6  | 33,8333333 | 9,2394084   |  |
| 2008                                                                                            | p2       | 6  | 12,5       | 4,929503    |  |
| 2008                                                                                            | p3       | 6  | 4          | 2,2803509   |  |
| 2008                                                                                            | p4       | 6  | 1          | 1,2649111   |  |
| 2008                                                                                            | p5       | 6  | 14,1666667 | 3,5449495   |  |

|        |       |   |            |             |  |
|--------|-------|---|------------|-------------|--|
| 2008   | p6    | 6 | 12,6666667 | 2,8047579   |  |
| 2008   | p7    | 6 | 10,3333333 | 4,0824829   |  |
| 2008   | p8    | 6 | 6,1666667  | 3,7638633   |  |
| 2009   | p1    | 6 | 44,3333333 | 15,1084965  |  |
| 2009   | p2    | 6 | 34,3333333 | 11,7075474  |  |
| 2009   | p3    | 6 | 16,5       | 7,1484264   |  |
| 2009   | p4    | 6 | 9          | 5,138093    |  |
| 2009   | p5    | 6 | 2,1666667  | 1,1690452   |  |
| 2009   | p6    | 6 | 7,5        | 5,8906706   |  |
| 2009   | p7    | 6 | 4,1666667  | 1,1690452   |  |
| 2009   | p8    | 6 | 3,5        | 1,8708287   |  |
| Level  | Level | N | Data11     |             |  |
| Care   | Care  |   | Mean       | Stand. Dev. |  |
| fianna | p1    | 9 | 34,7777778 | 9,743944    |  |
| fianna | p2    | 9 | 13         | 10,8857705  |  |
| fianna | p3    | 9 | 9,7777778  | 6,0161819   |  |
| fianna | p4    | 9 | 5,7777778  | 4,2360883   |  |
| fianna | p5    | 9 | 7,4444444  | 4,3043905   |  |
| fianna | p6    | 9 | 9,7777778  | 5,3098441   |  |
| fianna | p7    | 9 | 6,3333333  | 4,2720019   |  |
| fianna | p8    | 9 | 5,6666667  | 3,5355339   |  |
| irga   | p1    | 9 | 31,6666667 | 17,958285   |  |
| irga   | p2    | 9 | 20,4444444 | 18,2695861  |  |
| irga   | p3    | 9 | 11,2222222 | 7,6937926   |  |
| irga   | p4    | 9 | 5,8888889  | 5,3255151   |  |
| irga   | p5    | 9 | 9,1111111  | 6,9362173   |  |
| irga   | p6    | 9 | 9,8888889  | 3,982601    |  |
| irga   | p7    | 9 | 8,1111111  | 4,2557151   |  |
| irga   | p8    | 9 | 4,4444444  | 1,5092309   |  |

| Level | Level    | Level | N | Data11     |             |
|-------|----------|-------|---|------------|-------------|
| Years | Cultivar | Care  |   | Mean       | Stand. Dev. |
| 2007  | fianna   | p1    | 3 | 26,3333333 | 4,0414519   |
| 2007  | fianna   | p2    | 3 | 2,6666667  | 2,5166115   |
| 2007  | fianna   | p3    | 3 | 12         | 2           |
| 2007  | fianna   | p4    | 3 | 7,3333333  | 1,5275252   |
| 2007  | fianna   | p5    | 3 | 8          | 0           |
| 2007  | fianna   | p6    | 3 | 9,3333333  | 4,9328829   |
| 2007  | fianna   | p7    | 3 | 5,3333333  | 1,1547005   |
| 2007  | fianna   | p8    | 3 | 6,3333333  | 1,5275252   |
| 2007  | irga     | p1    | 3 | 16,6666667 | 6,1101009   |
| 2007  | irga     | p2    | 3 | 4          | 1           |
| 2007  | irga     | p3    | 3 | 10         | 1,7320508   |
| 2007  | irga     | p4    | 3 | 7,6666667  | 2,081666    |
| 2007  | irga     | p5    | 3 | 9          | 4,5825757   |
| 2007  | irga     | p6    | 3 | 9,3333333  | 2,081666    |
| 2007  | irga     | p7    | 3 | 9          | 6,244998    |
| 2007  | irga     | p8    | 3 | 4,6666667  | 1,5275252   |
| 2008  | fianna   | p1    | 3 | 37,6666667 | 10,40833    |
| 2008  | fianna   | p2    | 3 | 10,3333333 | 5,5075705   |
| 2008  | fianna   | p3    | 3 | 4,3333333  | 3,2145503   |
| 2008  | fianna   | p4    | 3 | 1,3333333  | 1,5275252   |
| 2008  | fianna   | p5    | 3 | 11,6666667 | 3,2145503   |
| 2008  | fianna   | p6    | 3 | 11         | 3           |
| 2008  | fianna   | p7    | 3 | 10         | 6,244998    |
| 2008  | fianna   | p8    | 3 | 7,6666667  | 5,1316014   |
| 2008  | irga     | p1    | 3 | 30         | 7,8102497   |
| 2008  | irga     | p2    | 3 | 14,6666667 | 4,0414519   |
| 2008  | irga     | p3    | 3 | 3,6666667  | 1,5275252   |

|      |        |    |   |            |            |
|------|--------|----|---|------------|------------|
| 2008 | irga   | p4 | 3 | 0,6666667  | 1,1547005  |
| 2008 | irga   | p5 | 3 | 16,6666667 | 1,5275252  |
| 2008 | irga   | p6 | 3 | 14,3333333 | 1,5275252  |
| 2008 | irga   | p7 | 3 | 10,6666667 | 1,5275252  |
| 2008 | irga   | p8 | 3 | 4,6666667  | 1,5275252  |
| 2009 | fianna | p1 | 3 | 40,3333333 | 9,4516313  |
| 2009 | fianna | p2 | 3 | 26         | 3,6055513  |
| 2009 | fianna | p3 | 3 | 13         | 7,9372539  |
| 2009 | fianna | p4 | 3 | 8,6666667  | 4,6188022  |
| 2009 | fianna | p5 | 3 | 2,6666667  | 1,5275252  |
| 2009 | fianna | p6 | 3 | 9          | 8,7177979  |
| 2009 | fianna | p7 | 3 | 3,6666667  | 0,5773503  |
| 2009 | fianna | p8 | 3 | 3          | 2          |
| 2009 | irga   | p1 | 3 | 48,3333333 | 20,81666   |
| 2009 | irga   | p2 | 3 | 42,6666667 | 11,0151411 |
| 2009 | irga   | p3 | 3 | 20         | 5,2915026  |
| 2009 | irga   | p4 | 3 | 9,3333333  | 6,6583281  |
| 2009 | irga   | p5 | 3 | 1,6666667  | 0,5773503  |
| 2009 | irga   | p6 | 3 | 6          | 2          |
| 2009 | irga   | p7 | 3 | 4,6666667  | 1,5275252  |
| 2009 | irga   | p8 | 3 | 4          | 2          |

Table S12. ANOVA table of monocotyledonous weeds before potato harvest

|                                                                                                                        |
|------------------------------------------------------------------------------------------------------------------------|
| 12. Tukey's studentized range (HSD) test for data12                                                                    |
| Data12=The number of monocotyledonous weeds before potato harvest                                                      |
| Note: This test checks the Type I error of the experimental group, but generally has a higher Type II error than REGWQ |

|                                                                                                                        |         |    |          |  |  |
|------------------------------------------------------------------------------------------------------------------------|---------|----|----------|--|--|
| Alpha                                                                                                                  | 0,05    |    |          |  |  |
| Degrees of freedom of error                                                                                            | 96      |    |          |  |  |
| Mean square error                                                                                                      | 17,5625 |    |          |  |  |
| Critical value of the studentized range                                                                                | 3,36669 |    |          |  |  |
| The difference is minimally significant                                                                                | 2,0365  |    |          |  |  |
| Medium with the same letter do not differ significantly                                                                |         |    |          |  |  |
| Grouping Tukey                                                                                                         | Mean    | N  | Years    |  |  |
| A                                                                                                                      | 12,5208 | 48 | 2008     |  |  |
|                                                                                                                        |         |    |          |  |  |
| B                                                                                                                      | 7,8958  | 48 | 2007     |  |  |
| B                                                                                                                      |         |    |          |  |  |
| B                                                                                                                      | 6,2292  | 48 | 2009     |  |  |
| Linear models GLM procedure                                                                                            |         |    |          |  |  |
| 12. Tukey's studentized range (HSD) test for data12                                                                    |         |    |          |  |  |
| Data12=The number of monocotyledonous weeds before potato harvest                                                      |         |    |          |  |  |
| Note: This test checks the Type I error of the experimental group, but generally has a higher Type II error than REGWQ |         |    |          |  |  |
| Alpha                                                                                                                  | 0,05    |    |          |  |  |
| Degrees of freedom of error                                                                                            | 96      |    |          |  |  |
| Mean square error                                                                                                      | 17,5625 |    |          |  |  |
| Critical value of the studentized range                                                                                | 2,80719 |    |          |  |  |
| The difference is minimally significant                                                                                | 1,3864  |    |          |  |  |
| Medium with the same letter do not differ significantly                                                                |         |    |          |  |  |
| Grouping Tukey                                                                                                         | Mean    | N  | Cultivar |  |  |
| A                                                                                                                      | 9,8194  | 72 | irga     |  |  |
|                                                                                                                        |         |    |          |  |  |
| B                                                                                                                      | 7,9444  | 72 | fianna   |  |  |
| Modele liniowe                                                                                                         |         |    |          |  |  |
| 12. Tukey's studentized range (HSD) test for data12                                                                    |         |    |          |  |  |

|                                                                                                                        |          |        |        |             |  |
|------------------------------------------------------------------------------------------------------------------------|----------|--------|--------|-------------|--|
| Data12=The number of monocotyledonous weeds before potato harvest                                                      |          |        |        |             |  |
| Note: This test checks the Type I error of the experimental group, but generally has a higher Type II error than REGWQ |          |        |        |             |  |
| Alpha                                                                                                                  | 0,05     |        |        |             |  |
| Degrees of freedom of error                                                                                            | 96       |        |        |             |  |
| Mean square error                                                                                                      | 17,5625  |        |        |             |  |
| Critical value of the studentized range                                                                                | 4,3824   |        |        |             |  |
| The difference is minimally significant                                                                                | 4,3288   |        |        |             |  |
| Medium with the same letter do not differ significantly                                                                |          |        |        |             |  |
| Grouping Tukey                                                                                                         |          | Mean   | N      | Care        |  |
|                                                                                                                        | A        | 18,056 | 18     | p1          |  |
|                                                                                                                        |          |        |        |             |  |
|                                                                                                                        | B        | 10,444 | 18     | p2          |  |
|                                                                                                                        | B        |        |        |             |  |
|                                                                                                                        | B        | 9      | 18     | p3          |  |
|                                                                                                                        | B        |        |        |             |  |
| C                                                                                                                      | B        | 8,167  | 18     | p5          |  |
| C                                                                                                                      | B        |        |        |             |  |
| C                                                                                                                      | B        | 8      | 18     | p6          |  |
| C                                                                                                                      | B        |        |        |             |  |
| C                                                                                                                      | B        | 6,611  | 18     | p4          |  |
| C                                                                                                                      | B        |        |        |             |  |
| C                                                                                                                      | B        | 6,556  | 18     | p7          |  |
| C                                                                                                                      |          |        |        |             |  |
| C                                                                                                                      |          | 4,222  | 18     | p8          |  |
| Linear models GLM procedure                                                                                            |          |        |        |             |  |
| Data12=The number of monocotyledonous weeds before potato harvest                                                      |          |        |        |             |  |
| Level                                                                                                                  | Level    | N      | Data12 |             |  |
| Years                                                                                                                  | Cultivar |        | Mean   | Stand. Dev. |  |



|       |        |    |            |             |  |
|-------|--------|----|------------|-------------|--|
| 2007  | fianna | 24 | 7,375      | 3,28120471  |  |
| 2007  | irga   | 24 | 8,4166667  | 4,41259725  |  |
| 2008  | fianna | 24 | 12,2083333 | 9,69974974  |  |
| 2008  | irga   | 24 | 12,8333333 | 9,10168005  |  |
| 2009  | fianna | 24 | 4,25       | 4,2656362   |  |
| 2009  | irga   | 24 | 8,2083333  | 8,5362611   |  |
| Level | Level  | N  | Data12     |             |  |
| Years | Care   |    | Mean       | Stand. Dev. |  |
| 2007  | p1     | 6  | 14,5       | 4,4609416   |  |
| 2007  | p2     | 6  | 8,1666667  | 2,786874    |  |
| 2007  | p3     | 6  | 7,8333333  | 1,8348479   |  |
| 2007  | p4     | 6  | 8,5        | 1,5165751   |  |
| 2007  | p5     | 6  | 7,6666667  | 3,6147845   |  |
| 2007  | p6     | 6  | 6          | 2,7568098   |  |
| 2007  | p7     | 6  | 5,5        | 1,7606817   |  |
| 2007  | p8     | 6  | 5          | 3,2249031   |  |
| 2008  | p1     | 6  | 30,8333333 | 6,2102067   |  |
| 2008  | p2     | 6  | 12,5       | 3,0166206   |  |
| 2008  | p3     | 6  | 5,3333333  | 3,4448028   |  |
| 2008  | p4     | 6  | 1,8333333  | 1,4719601   |  |
| 2008  | p5     | 6  | 15         | 6,0663004   |  |
| 2008  | p6     | 6  | 15         | 4,0496913   |  |
| 2008  | p7     | 6  | 13         | 5,2915026   |  |
| 2008  | p8     | 6  | 6,6666667  | 3,7771241   |  |
| 2009  | p1     | 6  | 8,8333333  | 3,1251667   |  |
| 2009  | p2     | 6  | 10,6666667 | 3,0110906   |  |
| 2009  | p3     | 6  | 13,8333333 | 10,1472492  |  |
| 2009  | p4     | 6  | 9,5        | 10,559356   |  |
| 2009  | p5     | 6  | 1,8333333  | 1,9407902   |  |

|          |          |       |            |             |             |
|----------|----------|-------|------------|-------------|-------------|
| 2009     | p6       | 6     | 3          | 2,1908902   |             |
| 2009     | p7       | 6     | 1,1666667  | 0,7527727   |             |
| 2009     | p8       | 6     | 1          | 0,8944272   |             |
| Level    | Level    | N     | Data12     |             |             |
| Cultivar | Care     |       | Mean       | Stand. Dev. |             |
| fianna   | p1       | 9     | 17,1111111 | 12,323194   |             |
| fianna   | p2       | 9     | 9,8888889  | 3,9193253   |             |
| fianna   | p3       | 9     | 7,2222222  | 2,9907264   |             |
| fianna   | p4       | 9     | 5,4444444  | 4,772607    |             |
| fianna   | p5       | 9     | 7,1111111  | 6,3333333   |             |
| fianna   | p6       | 9     | 6,4444444  | 5,1747249   |             |
| fianna   | p7       | 9     | 5,8888889  | 5,7106139   |             |
| fianna   | p8       | 9     | 4,4444444  | 4,8505441   |             |
| irga     | p1       | 9     | 19         | 9,1923882   |             |
| irga     | p2       | 9     | 11         | 2,6925824   |             |
| irga     | p3       | 9     | 10,7777778 | 9,2975505   |             |
| irga     | p4       | 9     | 7,7777778  | 8,5261037   |             |
| irga     | p5       | 9     | 9,2222222  | 7,4962954   |             |
| irga     | p6       | 9     | 9,5555556  | 6,6541549   |             |
| irga     | p7       | 9     | 7,2222222  | 6,3201617   |             |
| irga     | p8       | 9     | 4          | 2,236068    |             |
| Level    | Level    | Level | N          | Data12      |             |
| Years    | Cultivar | Care  |            | Mean        | Stand. Dev. |
| 2007     | fianna   | p1    | 3          | 11          | 2           |
| 2007     | fianna   | p2    | 3          | 6,3333333   | 2,3094011   |
| 2007     | fianna   | p3    | 3          | 8,6666667   | 1,5275252   |
| 2007     | fianna   | p4    | 3          | 9           | 1           |
| 2007     | fianna   | p5    | 3          | 7,6666667   | 4,7258156   |
| 2007     | fianna   | p6    | 3          | 6           | 3,4641016   |

|      |        |    |   |            |           |
|------|--------|----|---|------------|-----------|
| 2007 | fianna | p7 | 3 | 5,6666667  | 2,3094011 |
| 2007 | fianna | p8 | 3 | 4,6666667  | 5,033223  |
| 2007 | irga   | p1 | 3 | 18         | 3         |
| 2007 | irga   | p2 | 3 | 10         | 2         |
| 2007 | irga   | p3 | 3 | 7          | 2         |
| 2007 | irga   | p4 | 3 | 8          | 2         |
| 2007 | irga   | p5 | 3 | 7,6666667  | 3,2145503 |
| 2007 | irga   | p6 | 3 | 6          | 2,6457513 |
| 2007 | irga   | p7 | 3 | 5,3333333  | 1,5275252 |
| 2007 | irga   | p8 | 3 | 5,3333333  | 0,5773503 |
| 2008 | fianna | p1 | 3 | 32,6666667 | 5,8594653 |
| 2008 | fianna | p2 | 3 | 14         | 1,7320508 |
| 2008 | fianna | p3 | 3 | 6          | 5,1961524 |
| 2008 | fianna | p4 | 3 | 1,3333333  | 1,5275252 |
| 2008 | fianna | p5 | 3 | 12,6666667 | 5,8594653 |
| 2008 | fianna | p6 | 3 | 12         | 2,6457513 |
| 2008 | fianna | p7 | 3 | 11         | 7         |
| 2008 | fianna | p8 | 3 | 8          | 5,2915026 |
| 2008 | irga   | p1 | 3 | 29         | 7,2111026 |
| 2008 | irga   | p2 | 3 | 11         | 3,6055513 |
| 2008 | irga   | p3 | 3 | 4,6666667  | 1,1547005 |
| 2008 | irga   | p4 | 3 | 2,3333333  | 1,5275252 |
| 2008 | irga   | p5 | 3 | 17,3333333 | 6,4291005 |
| 2008 | irga   | p6 | 3 | 18         | 2,6457513 |
| 2008 | irga   | p7 | 3 | 15         | 3         |
| 2008 | irga   | p8 | 3 | 5,3333333  | 1,5275252 |
| 2009 | fianna | p1 | 3 | 7,6666667  | 4,0414519 |
| 2009 | fianna | p2 | 3 | 9,3333333  | 2,8867513 |
| 2009 | fianna | p3 | 3 | 7          | 1         |

|      |        |    |   |            |            |
|------|--------|----|---|------------|------------|
| 2009 | fianna | p4 | 3 | 6          | 6,5574385  |
| 2009 | fianna | p5 | 3 | 1          | 1          |
| 2009 | fianna | p6 | 3 | 1,3333333  | 1,5275252  |
| 2009 | fianna | p7 | 3 | 1          | 1          |
| 2009 | fianna | p8 | 3 | 0,6666667  | 0,5773503  |
| 2009 | irga   | p1 | 3 | 10         | 2          |
| 2009 | irga   | p2 | 3 | 12         | 3          |
| 2009 | irga   | p3 | 3 | 20,6666667 | 10,7857931 |
| 2009 | irga   | p4 | 3 | 13         | 14,106736  |
| 2009 | irga   | p5 | 3 | 2,6666667  | 2,5166115  |
| 2009 | irga   | p6 | 3 | 4,6666667  | 1,1547005  |
| 2009 | irga   | p7 | 3 | 1,3333333  | 0,5773503  |
| 2009 | irga   | p8 | 3 | 1,3333333  | 1,1547005  |

Table S13. ANOVA table of broadleaf weeds before potato harvest

| 13. Tukey's studentized range (HSD) test for data13                                                                    |          |    |       |  |  |
|------------------------------------------------------------------------------------------------------------------------|----------|----|-------|--|--|
| Data13=The number of dicotyledonous weeds before potato harvest                                                        |          |    |       |  |  |
| Note: This test checks the Type I error of the experimental group, but generally has a higher Type II error than REGWQ |          |    |       |  |  |
| Alpha                                                                                                                  | 0,05     |    |       |  |  |
| Degrees of freedom of error                                                                                            | 96       |    |       |  |  |
| Mean square error                                                                                                      | 23,38194 |    |       |  |  |
| Critical value of the studentized range                                                                                | 3,36669  |    |       |  |  |
| The difference is minimally significant                                                                                | 2,3498   |    |       |  |  |
| Medium with the same letter do not differ significantly                                                                |          |    |       |  |  |
| Grouping Tukey                                                                                                         | Mean     | N  | Years |  |  |
| A                                                                                                                      | 19,1875  | 48 | 2009  |  |  |

|                                                                                                                        |          |    |          |  |  |
|------------------------------------------------------------------------------------------------------------------------|----------|----|----------|--|--|
| B                                                                                                                      | 3,0417   | 48 | 2008     |  |  |
| B                                                                                                                      |          |    |          |  |  |
| B                                                                                                                      | 2,7083   | 48 | 2007     |  |  |
| Linear models GLM procedure                                                                                            |          |    |          |  |  |
| 13. Tukey's studentized range (HSD) test for data13                                                                    |          |    |          |  |  |
|                                                                                                                        |          |    |          |  |  |
| Data13=The number of dicotyledonous weeds before potato harvest                                                        |          |    |          |  |  |
| Note: This test checks the Type I error of the experimental group, but generally has a higher Type II error than REGWQ |          |    |          |  |  |
| Alpha                                                                                                                  | 0,05     |    |          |  |  |
| Degrees of freedom of error                                                                                            | 96       |    |          |  |  |
| Mean square error                                                                                                      | 23,38194 |    |          |  |  |
| Critical value of the studentized range                                                                                | 2,80719  |    |          |  |  |
| The difference is minimally significant                                                                                | 1,5997   |    |          |  |  |
| Medium with the same letter do not differ significantly                                                                |          |    |          |  |  |
| Grouping Tukey                                                                                                         | Mean     | N  | Cultivar |  |  |
| A                                                                                                                      | 9,25     | 72 | irga     |  |  |
|                                                                                                                        |          |    |          |  |  |
| B                                                                                                                      | 7,375    | 72 | fianna   |  |  |
| Linear models GLM procedure                                                                                            |          |    |          |  |  |
| 13. Tukey's studentized range (HSD) test for data13                                                                    |          |    |          |  |  |
| Data13=The number of dicotyledonous weeds before potato harvest                                                        |          |    |          |  |  |
| Note: This test checks the Type I error of the experimental group, but generally has a higher Type II error than REGWQ |          |    |          |  |  |
| Alpha                                                                                                                  | 0,05     |    |          |  |  |
| Degrees of freedom of error                                                                                            | 96       |    |          |  |  |
| Mean square error                                                                                                      | 23,38194 |    |          |  |  |
| Critical value of the studentized range                                                                                | 4,3824   |    |          |  |  |

|                                                                 |          |        |            |             |  |
|-----------------------------------------------------------------|----------|--------|------------|-------------|--|
| The difference is minimally significant                         |          | 4,9948 |            |             |  |
| Medium with the same letter do not differ significantly         |          |        |            |             |  |
| Grouping Tukey                                                  |          | Mean   | N          | Care        |  |
|                                                                 | A        | 21,444 | 18         | p1          |  |
|                                                                 |          |        |            |             |  |
|                                                                 | B        | 13,444 | 18         | p2          |  |
|                                                                 | B        |        |            |             |  |
| C                                                               | B        | 10,167 | 18         | p3          |  |
| C                                                               |          |        |            |             |  |
| C                                                               | D        | 5,278  | 18         | p6          |  |
|                                                                 | D        |        |            |             |  |
|                                                                 | D        | 5,167  | 18         | p7          |  |
|                                                                 | D        |        |            |             |  |
|                                                                 | D        | 4,556  | 18         | p4          |  |
|                                                                 | D        |        |            |             |  |
|                                                                 | D        | 3,278  | 18         | p5          |  |
|                                                                 | D        |        |            |             |  |
|                                                                 | D        | 3,167  | 18         | p8          |  |
| Linear models GLM procedure                                     |          |        |            |             |  |
| Data13=The number of dicotyledonous weeds before potato harvest |          |        |            |             |  |
| Level                                                           | Level    | N      | Data13     |             |  |
| Years                                                           | Cultivar |        | Mean       | Stand. Dev. |  |
| 2007                                                            | fianna   | 24     | 3,0416667  | 1,8528278   |  |
| 2007                                                            | irga     | 24     | 2,375      | 2,4283202   |  |
| 2008                                                            | fianna   | 24     | 3,625      | 3,2277668   |  |
| 2008                                                            | irga     | 24     | 2,4583333  | 2,5191297   |  |
| 2009                                                            | fianna   | 24     | 15,4583333 | 13,9376848  |  |
| 2009                                                            | irga     | 24     | 22,9166667 | 21,8988121  |  |
| Level                                                           | Level    | N      | Data13     |             |  |

| Years    | Care  |   | Mean       | Stand. Dev. |  |
|----------|-------|---|------------|-------------|--|
| 2007     | p1    | 6 | 3,6666667  | 1,9663842   |  |
| 2007     | p2    | 6 | 1,1666667  | 0,7527727   |  |
| 2007     | p3    | 6 | 2,6666667  | 1,8618987   |  |
| 2007     | p4    | 6 | 1,5        | 1,5165751   |  |
| 2007     | p5    | 6 | 5          | 2,1908902   |  |
| 2007     | p6    | 6 | 3,1666667  | 2,228602    |  |
| 2007     | p7    | 6 | 3,3333333  | 2,1602469   |  |
| 2007     | p8    | 6 | 1,1666667  | 1,9407902   |  |
| 2008     | p1    | 6 | 8,8333333  | 1,8348479   |  |
| 2008     | p2    | 6 | 4,1666667  | 2,1369761   |  |
| 2008     | p3    | 6 | 0,3333333  | 0,5163978   |  |
| 2008     | p4    | 6 | 0,3333333  | 0,5163978   |  |
| 2008     | p5    | 6 | 2,8333333  | 2,1369761   |  |
| 2008     | p6    | 6 | 3          | 2,0976177   |  |
| 2008     | p7    | 6 | 2,1666667  | 0,7527727   |  |
| 2008     | p8    | 6 | 2,6666667  | 1,3662601   |  |
| 2009     | p1    | 6 | 51,8333333 | 16,3880037  |  |
| 2009     | p2    | 6 | 35         | 13,6674797  |  |
| 2009     | p3    | 6 | 27,5       | 3,9874804   |  |
| 2009     | p4    | 6 | 11,8333333 | 11,6175155  |  |
| 2009     | p5    | 6 | 2          | 3,0331502   |  |
| 2009     | p6    | 6 | 9,6666667  | 8,6641022   |  |
| 2009     | p7    | 6 | 10         | 2,4494897   |  |
| 2009     | p8    | 6 | 5,6666667  | 5,0859283   |  |
| Level    | Level | N | Data13     |             |  |
| Cultivar | Care  |   | Mean       | Stand. Dev. |  |
| fianna   | p1    | 9 | 17,8888889 | 16,6316298  |  |
| fianna   | p2    | 9 | 10,6666667 | 12,5499004  |  |

|        |          |       |            |            |             |
|--------|----------|-------|------------|------------|-------------|
| fianna | p3       | 9     | 9,5555556  | 11,5770367 |             |
| fianna | p4       | 9     | 3,6666667  | 6,1032778  |             |
| fianna | p5       | 9     | 2,8888889  | 2,0275875  |             |
| fianna | p6       | 9     | 6,1111111  | 7,2705647  |             |
| fianna | p7       | 9     | 4,8888889  | 3,6893239  |             |
| fianna | p8       | 9     | 3,3333333  | 3,122499   |             |
| irga   | p1       | 9     | 25         | 30,2696217 |             |
| irga   | p2       | 9     | 16,2222222 | 21,7070137 |             |
| irga   | p3       | 9     | 10,7777778 | 14,7459976 |             |
| irga   | p4       | 9     | 5,4444444  | 10,345423  |             |
| irga   | p5       | 9     | 3,6666667  | 3,2787193  |             |
| irga   | p6       | 9     | 4,4444444  | 4,4752405  |             |
| irga   | p7       | 9     | 5,4444444  | 4,4752405  |             |
| irga   | p8       | 9     | 3          | 4,2130749  |             |
| Level  | Level    | Level | N          | Data13     |             |
| Years  | Cultivar | Care  |            | Mean       | Stand. Dev. |
| 2007   | fianna   | p1    | 3          | 4,3333333  | 2,081666    |
| 2007   | fianna   | p2    | 3          | 1,6666667  | 0,5773503   |
| 2007   | fianna   | p3    | 3          | 4          | 1           |
| 2007   | fianna   | p4    | 3          | 1,3333333  | 1,1547005   |
| 2007   | fianna   | p5    | 3          | 3,3333333  | 1,5275252   |
| 2007   | fianna   | p6    | 3          | 4,3333333  | 1,1547005   |
| 2007   | fianna   | p7    | 3          | 3,3333333  | 2,5166115   |
| 2007   | fianna   | p8    | 3          | 2          | 2,6457513   |
| 2007   | irga     | p1    | 3          | 3          | 2           |
| 2007   | irga     | p2    | 3          | 0,6666667  | 0,5773503   |
| 2007   | irga     | p3    | 3          | 1,3333333  | 1,5275252   |
| 2007   | irga     | p4    | 3          | 1,6666667  | 2,081666    |
| 2007   | irga     | p5    | 3          | 6,6666667  | 1,1547005   |



|      |        |    |   |            |            |
|------|--------|----|---|------------|------------|
| 2007 | irga   | p6 | 3 | 2          | 2,6457513  |
| 2007 | irga   | p7 | 3 | 3,3333333  | 2,3094011  |
| 2007 | irga   | p8 | 3 | 0,3333333  | 0,5773503  |
| 2008 | fianna | p1 | 3 | 10         | 1,7320508  |
| 2008 | fianna | p2 | 3 | 4,3333333  | 2,081666   |
| 2008 | fianna | p3 | 3 | 0          | 0          |
| 2008 | fianna | p4 | 3 | 0,3333333  | 0,5773503  |
| 2008 | fianna | p5 | 3 | 4,3333333  | 2,081666   |
| 2008 | fianna | p6 | 3 | 4,6666667  | 0,5773503  |
| 2008 | fianna | p7 | 3 | 2,3333333  | 0,5773503  |
| 2008 | fianna | p8 | 3 | 3          | 2          |
| 2008 | irga   | p1 | 3 | 7,6666667  | 1,1547005  |
| 2008 | irga   | p2 | 3 | 4          | 2,6457513  |
| 2008 | irga   | p3 | 3 | 0,6666667  | 0,5773503  |
| 2008 | irga   | p4 | 3 | 0,3333333  | 0,5773503  |
| 2008 | irga   | p5 | 3 | 1,3333333  | 0,5773503  |
| 2008 | irga   | p6 | 3 | 1,3333333  | 1,5275252  |
| 2008 | irga   | p7 | 3 | 2          | 1          |
| 2008 | irga   | p8 | 3 | 2,3333333  | 0,5773503  |
| 2009 | fianna | p1 | 3 | 39,3333333 | 6,350853   |
| 2009 | fianna | p2 | 3 | 26         | 9,539392   |
| 2009 | fianna | p3 | 3 | 24,6666667 | 3,0550505  |
| 2009 | fianna | p4 | 3 | 9,3333333  | 8,6216781  |
| 2009 | fianna | p5 | 3 | 1          | 1          |
| 2009 | fianna | p6 | 3 | 9,3333333  | 13,6503968 |
| 2009 | fianna | p7 | 3 | 9          | 3          |
| 2009 | fianna | p8 | 3 | 5          | 4,5825757  |
| 2009 | irga   | p1 | 3 | 64,3333333 | 12,7410099 |
| 2009 | irga   | p2 | 3 | 44         | 11,5325626 |

|      |      |    |   |            |            |
|------|------|----|---|------------|------------|
| 2009 | irga | p3 | 3 | 30,3333333 | 2,5166115  |
| 2009 | irga | p4 | 3 | 14,3333333 | 15,6311655 |
| 2009 | irga | p5 | 3 | 3          | 4,3588989  |
| 2009 | irga | p6 | 3 | 10         | 1          |
| 2009 | irga | p7 | 3 | 11         | 1,7320508  |
| 2009 | irga | p8 | 3 | 6,3333333  | 6,5064071  |

Table S14. Table of variance analysis of ANOVA of number of monocotyledonous and dicotyledonous weeds before harvesting

| 14. Tukey's studentized range (HSD) test for data14                                                                     |          |    |          |  |  |
|-------------------------------------------------------------------------------------------------------------------------|----------|----|----------|--|--|
| Data14=Number of monocotyledonous and dicotyledonous weeds before harvesting                                            |          |    |          |  |  |
| Note: This test checks the Type I error of the experimental group, but generally has a higher Type II error than REGWQ  |          |    |          |  |  |
| Alpha                                                                                                                   | 0,05     |    |          |  |  |
| Degrees of freedom of error                                                                                             | 96       |    |          |  |  |
| Mean square error                                                                                                       | 43,63889 |    |          |  |  |
| Critical value of the studentized range                                                                                 | 2,80719  |    |          |  |  |
| The difference is minimally significant                                                                                 | 2,1855   |    |          |  |  |
| Medium with the same letter do not differ significantly                                                                 |          |    |          |  |  |
| Grouping Tukey                                                                                                          | Mean     | N  | Cultivar |  |  |
| A                                                                                                                       | 19,014   | 72 | irga     |  |  |
|                                                                                                                         |          |    |          |  |  |
| B                                                                                                                       | 15,306   | 72 | fianna   |  |  |
| Linear models GLM procedure                                                                                             |          |    |          |  |  |
| 14. Tukey's studentized range (HSD) test for data14                                                                     |          |    |          |  |  |
| Data14=Number of monocotyledonous and dicotyledonous weeds before harvesting                                            |          |    |          |  |  |
| Note: This test checks the Type I error of the experimental group, but generally has a higher Type II error than REGWQ. |          |    |          |  |  |

|                                                                              |          |          |            |             |  |
|------------------------------------------------------------------------------|----------|----------|------------|-------------|--|
| Alpha                                                                        |          | 0,05     |            |             |  |
| Degrees of freedom of error                                                  |          | 96       |            |             |  |
| Mean square error                                                            |          | 43,63889 |            |             |  |
| Critical value of the studentized range                                      |          | 4,3824   |            |             |  |
| The difference is minimally significant                                      |          | 6,8236   |            |             |  |
| Medium with the same letter do not differ significantly                      |          |          |            |             |  |
| Grouping Tukey                                                               |          | Mean     | N          | Care        |  |
|                                                                              | A        | 39,5     | 18         | p1          |  |
|                                                                              |          |          |            |             |  |
|                                                                              | B        | 23,944   | 18         | p2          |  |
|                                                                              | B        |          |            |             |  |
| C                                                                            | B        | 19,222   | 18         | p3          |  |
| C                                                                            |          |          |            |             |  |
| C                                                                            | D        | 13,278   | 18         | p6          |  |
|                                                                              | D        |          |            |             |  |
|                                                                              | D        | 11,556   | 18         | p7          |  |
|                                                                              | D        |          |            |             |  |
|                                                                              | D        | 11,444   | 18         | p5          |  |
|                                                                              | D        |          |            |             |  |
|                                                                              | D        | 10,833   | 18         | p4          |  |
|                                                                              | D        |          |            |             |  |
|                                                                              | D        | 7,5      | 18         | p8          |  |
| Linear models GLM procedure                                                  |          |          |            |             |  |
| Data14=Number of monocotyledonous and dicotyledonous weeds before harvesting |          |          |            |             |  |
| Level                                                                        | Level    | N        | Data14     |             |  |
| Years                                                                        | Cultivar |          | Mean       | Stand. Dev. |  |
| 2007                                                                         | fianna   | 24       | 10,4166667 | 3,7056557   |  |
| 2007                                                                         | irga     | 24       | 10,75      | 4,8297088   |  |
| 2008                                                                         | fianna   | 24       | 15,7916667 | 12,4655322  |  |

|       |        |    |            |             |  |
|-------|--------|----|------------|-------------|--|
| 2008  | irga   | 24 | 15,25      | 10,6658741  |  |
| 2009  | fianna | 24 | 19,7083333 | 17,1476432  |  |
| 2009  | irga   | 24 | 31,0416667 | 26,6775906  |  |
| Level | Level  | N  | Data14     |             |  |
| Years | Care   |    | Mean       | Stand. Dev. |  |
| 2007  | p1     | 6  | 18,1666667 | 4,3550737   |  |
| 2007  | p2     | 6  | 9,5        | 2,5884358   |  |
| 2007  | p3     | 6  | 10,6666667 | 2,5819889   |  |
| 2007  | p4     | 6  | 9,1666667  | 2,228602    |  |
| 2007  | p5     | 6  | 12,6666667 | 3,1411251   |  |
| 2007  | p6     | 6  | 9,1666667  | 2,4013885   |  |
| 2007  | p7     | 6  | 8,8333333  | 3,060501    |  |
| 2007  | p8     | 6  | 6,5        | 2,0736441   |  |
| 2008  | p1     | 6  | 39,6666667 | 5,9553897   |  |
| 2008  | p2     | 6  | 16,6666667 | 2,9439203   |  |
| 2008  | p3     | 6  | 5,6666667  | 3,4448028   |  |
| 2008  | p4     | 6  | 2          | 1,7888544   |  |
| 2008  | p5     | 6  | 17,8333333 | 5,419102    |  |
| 2008  | p6     | 6  | 18         | 2,9664794   |  |
| 2008  | p7     | 6  | 15         | 5,0990195   |  |
| 2008  | p8     | 6  | 9,3333333  | 4,2739521   |  |
| 2009  | p1     | 6  | 60,6666667 | 17,2588142  |  |
| 2009  | p2     | 6  | 45,6666667 | 15,2665211  |  |
| 2009  | p3     | 6  | 41,3333333 | 12,1600439  |  |
| 2009  | p4     | 6  | 21,3333333 | 18,9173642  |  |
| 2009  | p5     | 6  | 3,8333333  | 4,833908    |  |
| 2009  | p6     | 6  | 12,6666667 | 9,8725208   |  |
| 2009  | p7     | 6  | 10,8333333 | 2,1369761   |  |
| 2009  | p8     | 6  | 6,6666667  | 5,8537737   |  |

| Level    | Level    | N     | Data14     |             |             |
|----------|----------|-------|------------|-------------|-------------|
| Cultivar | Care     |       | Mean       | Stand. Dev. |             |
| fianna   | p1       | 9     | 35         | 15,7241852  |             |
| fianna   | p2       | 9     | 20,5555556 | 12,6995188  |             |
| fianna   | p3       | 9     | 16,7777778 | 11,997685   |             |
| fianna   | p4       | 9     | 9          | 9,7851929   |             |
| fianna   | p5       | 9     | 10         | 7,2801099   |             |
| fianna   | p6       | 9     | 12,5555556 | 8,4721767   |             |
| fianna   | p7       | 9     | 10,7777778 | 4,8933061   |             |
| fianna   | p8       | 9     | 7,7777778  | 4,867694    |             |
| irga     | p1       | 9     | 44         | 24,5916653  |             |
| irga     | p2       | 9     | 27,3333333 | 22,7651049  |             |
| irga     | p3       | 9     | 21,6666667 | 22,4944438  |             |
| irga     | p4       | 9     | 12,6666667 | 16,3935963  |             |
| irga     | p5       | 9     | 12,8888889 | 7,5240356   |             |
| irga     | p6       | 9     | 14         | 5,1720402   |             |
| irga     | p7       | 9     | 12,3333333 | 3,8078866   |             |
| irga     | p8       | 9     | 7,2222222  | 3,929942    |             |
| Level    | Level    | Level | Data14     |             |             |
| Years    | Cultivar | Care  | N          | Mean        | Stand. Dev. |
| 2007     | fianna   | p1    | 3          | 15,3333333  | 4,0414519   |
| 2007     | fianna   | p2    | 3          | 8           | 2,6457513   |
| 2007     | fianna   | p3    | 3          | 12,6666667  | 1,5275252   |
| 2007     | fianna   | p4    | 3          | 10,3333333  | 2,081666    |
| 2007     | fianna   | p5    | 3          | 11          | 3,4641016   |
| 2007     | fianna   | p6    | 3          | 10,3333333  | 3,0550505   |
| 2007     | fianna   | p7    | 3          | 9           | 4,5825757   |
| 2007     | fianna   | p8    | 3          | 6,6666667   | 2,8867513   |
| 2007     | irga     | p1    | 3          | 21          | 2,6457513   |

|      |        |    |   |            |            |
|------|--------|----|---|------------|------------|
| 2007 | irga   | p2 | 3 | 11         | 1,7320508  |
| 2007 | irga   | p3 | 3 | 8,6666667  | 1,5275252  |
| 2007 | irga   | p4 | 3 | 8          | 2          |
| 2007 | irga   | p5 | 3 | 14,3333333 | 2,081666   |
| 2007 | irga   | p6 | 3 | 8          | 1          |
| 2007 | irga   | p7 | 3 | 8,6666667  | 1,5275252  |
| 2007 | irga   | p8 | 3 | 6,3333333  | 1,5275252  |
| 2008 | fianna | p1 | 3 | 42,6666667 | 4,9328829  |
| 2008 | fianna | p2 | 3 | 18,3333333 | 3,5118846  |
| 2008 | fianna | p3 | 3 | 6          | 5,1961524  |
| 2008 | fianna | p4 | 3 | 1,3333333  | 1,5275252  |
| 2008 | fianna | p5 | 3 | 17         | 5          |
| 2008 | fianna | p6 | 3 | 16,6666667 | 3,2145503  |
| 2008 | fianna | p7 | 3 | 13,3333333 | 7,2341781  |
| 2008 | fianna | p8 | 3 | 11         | 6          |
| 2008 | irga   | p1 | 3 | 36,6666667 | 6,1101009  |
| 2008 | irga   | p2 | 3 | 15         | 1          |
| 2008 | irga   | p3 | 3 | 5,3333333  | 1,5275252  |
| 2008 | irga   | p4 | 3 | 2,6666667  | 2,081666   |
| 2008 | irga   | p5 | 3 | 18,6666667 | 6,8068593  |
| 2008 | irga   | p6 | 3 | 19,3333333 | 2,5166115  |
| 2008 | irga   | p7 | 3 | 16,6666667 | 2,081666   |
| 2008 | irga   | p8 | 3 | 7,6666667  | 1,1547005  |
| 2009 | fianna | p1 | 3 | 47         | 8          |
| 2009 | fianna | p2 | 3 | 35,3333333 | 7,3711148  |
| 2009 | fianna | p3 | 3 | 31,6666667 | 3,7859389  |
| 2009 | fianna | p4 | 3 | 15,3333333 | 15,011107  |
| 2009 | fianna | p5 | 3 | 2          | 2          |
| 2009 | fianna | p6 | 3 | 10,6666667 | 15,1437556 |

|      |        |    |   |            |            |
|------|--------|----|---|------------|------------|
| 2009 | fianna | p7 | 3 | 10         | 2,6457513  |
| 2009 | fianna | p8 | 3 | 5,6666667  | 5,1316014  |
| 2009 | irga   | p1 | 3 | 74,3333333 | 10,9696551 |
| 2009 | irga   | p2 | 3 | 56         | 14,4222051 |
| 2009 | irga   | p3 | 3 | 51         | 8,660254   |
| 2009 | irga   | p4 | 3 | 27,3333333 | 23,6924742 |
| 2009 | irga   | p5 | 3 | 5,6666667  | 6,6583281  |
| 2009 | irga   | p6 | 3 | 14,6666667 | 1,5275252  |
| 2009 | irga   | p7 | 3 | 11,6666667 | 1,5275252  |
| 2009 | irga   | p8 | 3 | 7,6666667  | 7,5055535  |

Table S15. Table of variance analysis ANOVA of fresh weeds mass

| 15. Tukey's studentized range (HSD) test for data 15                                                                    |          |    |       |  |  |
|-------------------------------------------------------------------------------------------------------------------------|----------|----|-------|--|--|
| Data15= Fresh weed mass                                                                                                 |          |    |       |  |  |
| Note: This test checks the Type I error of the experimental group, but generally has a higher Type II error than REGWQ. |          |    |       |  |  |
| Alpha                                                                                                                   | 0,05     |    |       |  |  |
| Degrees of freedom of error                                                                                             | 96       |    |       |  |  |
| Mean square error                                                                                                       | 13628,99 |    |       |  |  |
| Critical value of the studentized range                                                                                 | 3,36669  |    |       |  |  |
| The difference is minimally significant                                                                                 | 56,73    |    |       |  |  |
| Medium with the same letter do not differ significantly                                                                 |          |    |       |  |  |
| Grupowanie Tukey                                                                                                        | Mean     | N  | Years |  |  |
| A                                                                                                                       | 295,31   | 48 | 2008  |  |  |
| A                                                                                                                       |          |    |       |  |  |
| A                                                                                                                       | 276,67   | 48 | 2007  |  |  |
|                                                                                                                         |          |    |       |  |  |

|                                                                                                                        |          |    |          |  |  |
|------------------------------------------------------------------------------------------------------------------------|----------|----|----------|--|--|
| B                                                                                                                      | 190,31   | 48 | 2009     |  |  |
| Linear models GLM procedure                                                                                            |          |    |          |  |  |
| 15. Tukey's studentized range (HSD) test for data15                                                                    |          |    |          |  |  |
|                                                                                                                        |          |    |          |  |  |
| Data15 = Fresh weed mass                                                                                               |          |    |          |  |  |
| Note: This test checks the Type I error of the experimental group, but generally has a higher Type II error than REGWQ |          |    |          |  |  |
| Alpha                                                                                                                  | 0,05     |    |          |  |  |
| Degrees of freedom of error                                                                                            | 96       |    |          |  |  |
| Mean square error                                                                                                      | 13628,99 |    |          |  |  |
| Critical value of the studentized range                                                                                | 2,80719  |    |          |  |  |
| The difference is minimally significant                                                                                | 38,622   |    |          |  |  |
| Medium with the same letter do not differ significantly                                                                |          |    |          |  |  |
| Grouping Tukey                                                                                                         | Mean     | N  | Cultivar |  |  |
| A                                                                                                                      | 286,74   | 72 | irga     |  |  |
|                                                                                                                        |          |    |          |  |  |
| B                                                                                                                      | 221,46   | 72 | fianna   |  |  |
| Linear models GLM procedure                                                                                            |          |    |          |  |  |
| 15. Tukey's studentized range (HSD) test for data15                                                                    |          |    |          |  |  |
|                                                                                                                        |          |    |          |  |  |
| Data15= Fresh weed mass                                                                                                |          |    |          |  |  |
| Note: This test checks the Type I error of the experimental group, but generally has a higher Type II error than REGWQ |          |    |          |  |  |
| Alpha                                                                                                                  | 0,05     |    |          |  |  |
| Degrees of freedom of error                                                                                            | 96       |    |          |  |  |
| Mean square error                                                                                                      | 13628,99 |    |          |  |  |
| Critical value of the studentized range                                                                                | 4,3824   |    |          |  |  |
| The difference is minimally significant                                                                                | 120,59   |    |          |  |  |
| Medium with the same letter do not differ significantly                                                                |          |    |          |  |  |



| Grouping Tukey              |          |    | Mean       | N           | Care |
|-----------------------------|----------|----|------------|-------------|------|
|                             | A        |    | 576,94     | 18          | p1   |
|                             |          |    |            |             |      |
|                             | B        |    | 321,11     | 18          | p2   |
|                             | B        |    |            |             |      |
| C                           | B        |    | 260,56     | 18          | p5   |
| C                           | B        |    |            |             |      |
| C                           | B        | D  | 231,67     | 18          | p3   |
| C                           | B        | D  |            |             |      |
| C                           | B        | D  | 227,5      | 18          | p6   |
| C                           |          | D  |            |             |      |
| C                           |          | D  | 161,11     | 18          | p8   |
| C                           |          | D  |            |             |      |
| C                           |          | D  | 142,5      | 18          | p7   |
|                             |          | D  |            |             |      |
|                             |          | D  | 111,39     | 18          | p4   |
| Linear models GLM procedure |          |    |            |             |      |
| Data15= Fresh weed mass     |          |    |            |             |      |
| Level                       | Level    | N  | Data15     |             |      |
| Years                       | Cultivar |    | Mean       | Stand. Dev. |      |
| 2007                        | fianna   | 24 | 270,208333 | 135,626398  |      |
| 2007                        | irga     | 24 | 283,125    | 138,452727  |      |
| 2008                        | fianna   | 24 | 279,791667 | 189,447017  |      |
| 2008                        | irga     | 24 | 310,833333 | 277,980554  |      |
| 2009                        | fianna   | 24 | 114,375    | 137,345269  |      |
| 2009                        | irga     | 24 | 266,25     | 265,039989  |      |
| Level                       | Level    | N  | Data15     |             |      |
| Years                       | Care     |    | Mean       | Stand. Dev. |      |
| 2007                        | p1       | 6  | 514,166667 | 121,054395  |      |

|          |       |   |            |             |  |
|----------|-------|---|------------|-------------|--|
| 2007     | p2    | 6 | 228,333333 | 70,545494   |  |
| 2007     | p3    | 6 | 349,166667 | 100,767885  |  |
| 2007     | p4    | 6 | 196,666667 | 29,439203   |  |
| 2007     | p5    | 6 | 301,666667 | 84,950966   |  |
| 2007     | p6    | 6 | 241,666667 | 103,569622  |  |
| 2007     | p7    | 6 | 157,5      | 92,07334    |  |
| 2007     | p8    | 6 | 224,166667 | 95,25842    |  |
| 2008     | p1    | 6 | 739,166667 | 272,073826  |  |
| 2008     | p2    | 6 | 305        | 46,368092   |  |
| 2008     | p3    | 6 | 125,833333 | 63,120256   |  |
| 2008     | p4    | 6 | 50,833333  | 25,96472    |  |
| 2008     | p5    | 6 | 434,166667 | 124,555878  |  |
| 2008     | p6    | 6 | 330,833333 | 137,091818  |  |
| 2008     | p7    | 6 | 172,5      | 60,724789   |  |
| 2008     | p8    | 6 | 204,166667 | 92,758647   |  |
| 2009     | p1    | 6 | 477,5      | 304,97131   |  |
| 2009     | p2    | 6 | 430        | 262,373779  |  |
| 2009     | p3    | 6 | 220        | 162,111073  |  |
| 2009     | p4    | 6 | 86,666667  | 86,17811    |  |
| 2009     | p5    | 6 | 45,833333  | 74,324738   |  |
| 2009     | p6    | 6 | 110        | 99,247166   |  |
| 2009     | p7    | 6 | 97,5       | 56,013391   |  |
| 2009     | p8    | 6 | 55         | 65,115282   |  |
| Level    | Level | N | Data15     |             |  |
| Cultivar | Care  |   | Mean       | Stand. Dev. |  |
| fianna   | p1    | 9 | 455        | 145,580734  |  |
| fianna   | p2    | 9 | 252,222222 | 76,285283   |  |
| fianna   | p3    | 9 | 215,555556 | 154,706263  |  |
| fianna   | p4    | 9 | 96,111111  | 68,773986   |  |

|        |          |       |            |            |             |
|--------|----------|-------|------------|------------|-------------|
| fianna | p5       | 9     | 292,222222 | 225,403958 |             |
| fianna | p6       | 9     | 212,222222 | 177,800997 |             |
| fianna | p7       | 9     | 101,666667 | 56,844085  |             |
| fianna | p8       | 9     | 146,666667 | 111,383347 |             |
| irga   | p1       | 9     | 698,888889 | 298,347299 |             |
| irga   | p2       | 9     | 390        | 215,696546 |             |
| irga   | p3       | 9     | 247,777778 | 140,00248  |             |
| irga   | p4       | 9     | 126,666667 | 94,934188  |             |
| irga   | p5       | 9     | 228,888889 | 151,81769  |             |
| irga   | p6       | 9     | 242,777778 | 104,794773 |             |
| irga   | p7       | 9     | 183,333333 | 70,311806  |             |
| irga   | p8       | 9     | 175,555556 | 116,7916   |             |
| Level  | Poziom   | Level | N          | Data15     |             |
| Years  | Cultivar | Care  |            | Mean       | Stand. Dev. |
| 2007   | fianna   | p1    | 3          | 465        | 93,407708   |
| 2007   | fianna   | p2    | 3          | 180        | 13,228757   |
| 2007   | fianna   | p3    | 3          | 406,666667 | 63,70505    |
| 2007   | fianna   | p4    | 3          | 180        | 13,228757   |
| 2007   | fianna   | p5    | 3          | 363,333333 | 12,583057   |
| 2007   | fianna   | p6    | 3          | 236,666667 | 83,26664    |
| 2007   | fianna   | p7    | 3          | 80         | 30          |
| 2007   | fianna   | p8    | 3          | 250        | 107,587174  |
| 2007   | irga     | p1    | 3          | 563,333333 | 143,730071  |
| 2007   | irga     | p2    | 3          | 276,666667 | 72,514366   |
| 2007   | irga     | p3    | 3          | 291,666667 | 106,8098    |
| 2007   | irga     | p4    | 3          | 213,333333 | 34,034296   |
| 2007   | irga     | p5    | 3          | 240        | 80,467385   |
| 2007   | irga     | p6    | 3          | 246,666667 | 140,742081  |
| 2007   | irga     | p7    | 3          | 235        | 47,69696    |

|      |        |    |   |            |            |
|------|--------|----|---|------------|------------|
| 2007 | irga   | p8 | 3 | 198,333333 | 95,437589  |
| 2008 | fianna | p1 | 3 | 556,666667 | 63,50853   |
| 2008 | fianna | p2 | 3 | 300        | 39,051248  |
| 2008 | fianna | p3 | 3 | 138,333333 | 85,049005  |
| 2008 | fianna | p4 | 3 | 58,333333  | 18,929694  |
| 2008 | fianna | p5 | 3 | 496,666667 | 136,59551  |
| 2008 | fianna | p6 | 3 | 366,666667 | 183,325757 |
| 2008 | fianna | p7 | 3 | 163,333333 | 53,463383  |
| 2008 | fianna | p8 | 3 | 158,333333 | 30,550505  |
| 2008 | irga   | p1 | 3 | 921,666667 | 284,795248 |
| 2008 | irga   | p2 | 3 | 310        | 61,441029  |
| 2008 | irga   | p3 | 3 | 113,333333 | 47,521925  |
| 2008 | irga   | p4 | 3 | 43,333333  | 34,034296  |
| 2008 | irga   | p5 | 3 | 371,666667 | 91,696965  |
| 2008 | irga   | p6 | 3 | 295        | 97,596106  |
| 2008 | irga   | p7 | 3 | 181,666667 | 78,155827  |
| 2008 | irga   | p8 | 3 | 250        | 119,478031 |
| 2009 | fianna | p1 | 3 | 343,333333 | 194,057552 |
| 2009 | fianna | p2 | 3 | 276,666667 | 97,125349  |
| 2009 | fianna | p3 | 3 | 101,666667 | 35,472994  |
| 2009 | fianna | p4 | 3 | 50         | 50         |
| 2009 | fianna | p5 | 3 | 16,666667  | 15,275252  |
| 2009 | fianna | p6 | 3 | 33,333333  | 35,118846  |
| 2009 | fianna | p7 | 3 | 61,666667  | 18,929694  |
| 2009 | fianna | p8 | 3 | 31,666667  | 32,532035  |
| 2009 | irga   | p1 | 3 | 611,666667 | 375,310982 |
| 2009 | irga   | p2 | 3 | 583,333333 | 303,534732 |
| 2009 | irga   | p3 | 3 | 338,333333 | 149,777613 |
| 2009 | irga   | p4 | 3 | 123,333333 | 109,696551 |

|      |      |    |   |            |           |
|------|------|----|---|------------|-----------|
| 2009 | irga | p5 | 3 | 75         | 105       |
| 2009 | irga | p6 | 3 | 186,666667 | 75,883683 |
| 2009 | irga | p7 | 3 | 133,333333 | 60,277138 |
| 2009 | irga | p8 | 3 | 78,333333  | 88,92881  |

Table S16. Table of variance analysis ANOVA of dry weed mass

| 16. Tukey's studentized range (HSD) test for data16                                                                     |          |    |       |  |  |
|-------------------------------------------------------------------------------------------------------------------------|----------|----|-------|--|--|
| Data16=Dry weed mass                                                                                                    |          |    |       |  |  |
| Note: This test checks the Type I error of the experimental group, but generally has a higher Type II error than REGWQ. |          |    |       |  |  |
| Alpha                                                                                                                   | 0,05     |    |       |  |  |
| Degrees of freedom of error                                                                                             | 96       |    |       |  |  |
| Mean square error                                                                                                       | 2380,845 |    |       |  |  |
| Critical value of the studentized range                                                                                 | 3,36669  |    |       |  |  |
| The difference is minimally significant                                                                                 | 23,711   |    |       |  |  |
| Medium with the same letter do not differ significantly                                                                 |          |    |       |  |  |
| Grouping Tukey                                                                                                          | Mean     | N  | Years |  |  |
| A                                                                                                                       | 132,256  | 48 | 2008  |  |  |
| A                                                                                                                       |          |    |       |  |  |
| A                                                                                                                       | 114,063  | 48 | 2007  |  |  |
|                                                                                                                         |          |    |       |  |  |
| B                                                                                                                       | 62,167   | 48 | 2009  |  |  |
| Linear models GLM procedure                                                                                             |          |    |       |  |  |
| 16. Tukey's studentized range (HSD) test for data16                                                                     |          |    |       |  |  |
| Data16=Dry weed mass                                                                                                    |          |    |       |  |  |

|                                                                                                                         |          |        |          |      |  |
|-------------------------------------------------------------------------------------------------------------------------|----------|--------|----------|------|--|
| Note: This test checks the Type I error of the experimental group, but generally has a higher Type II error than REGWQ  |          |        |          |      |  |
| Alpha                                                                                                                   | 0,05     |        |          |      |  |
| Degrees of freedom of error                                                                                             | 96       |        |          |      |  |
| Mean square error                                                                                                       | 2380,845 |        |          |      |  |
| Critical value of the studentized range                                                                                 | 2,80719  |        |          |      |  |
| The difference is minimally significant                                                                                 | 16,143   |        |          |      |  |
| Medium with the same letter do not differ significantly                                                                 |          |        |          |      |  |
| Grouping Tukey                                                                                                          | Mean     | N      | Cultivar |      |  |
| A                                                                                                                       | 116,963  | 72     | irga     |      |  |
|                                                                                                                         |          |        |          |      |  |
| B                                                                                                                       | 88,694   | 72     | fianna   |      |  |
| Linear models GLM procedure                                                                                             |          |        |          |      |  |
| 16. Tukey's studentized range (HSD) test for data16                                                                     |          |        |          |      |  |
|                                                                                                                         |          |        |          |      |  |
| Data16=Dry weed mass                                                                                                    |          |        |          |      |  |
| Note: This test checks the Type I error of the experimental group, but generally has a higher Type II error than REGWQ. |          |        |          |      |  |
| Alpha                                                                                                                   | 0,05     |        |          |      |  |
| Degrees of freedom of error                                                                                             | 96       |        |          |      |  |
| Mean square error                                                                                                       | 2380,845 |        |          |      |  |
| Critical value of the studentized range                                                                                 | 4,3824   |        |          |      |  |
| The difference is minimally significant                                                                                 | 50,401   |        |          |      |  |
| Medium with the same letter do not differ significantly                                                                 |          |        |          |      |  |
| Grouping Tukey                                                                                                          |          | Mean   | N        | Care |  |
|                                                                                                                         | A        | 236,75 | 18       | p1   |  |
|                                                                                                                         |          |        |          |      |  |
|                                                                                                                         | B        | 142,75 | 18       | p2   |  |
|                                                                                                                         | B        |        |          |      |  |

|                             |          |       |            |             |  |
|-----------------------------|----------|-------|------------|-------------|--|
| C                           | B        | 94,5  | 18         | p6          |  |
| C                           |          |       |            |             |  |
| C                           |          | 90,11 | 18         | p5          |  |
| C                           |          |       |            |             |  |
| C                           |          | 76,67 | 18         | p3          |  |
| C                           |          |       |            |             |  |
| C                           |          | 63,14 | 18         | p7          |  |
| C                           |          |       |            |             |  |
| C                           |          | 62,86 | 18         | p8          |  |
| C                           |          |       |            |             |  |
| C                           |          | 55,85 | 18         | p4          |  |
| Linear models GLM procedure |          |       |            |             |  |
| Data16=Dry weed mass        |          |       |            |             |  |
| Level                       | Level    | N     | Data16     |             |  |
| Years                       | Cultivar |       | Średnia    | Stand. Dev. |  |
| 2007                        | fianna   | 24    | 102,708333 | 55,462074   |  |
| 2007                        | irga     | 24    | 125,416667 | 44,279661   |  |
| 2008                        | fianna   | 24    | 122,333333 | 82,595224   |  |
| 2008                        | irga     | 24    | 142,179167 | 118,579659  |  |
| 2009                        | fianna   | 24    | 41,041667  | 66,373436   |  |
| 2009                        | irga     | 24    | 83,291667  | 92,854364   |  |
| Level                       | Level    | N     | Data16     |             |  |
| Years                       | Care     |       | Mean       | Stand. Dev. |  |
| 2007                        | p1       | 6     | 182,5      | 46,98404    |  |
| 2007                        | p2       | 6     | 145        | 37,013511   |  |
| 2007                        | p3       | 6     | 114,166667 | 41,643327   |  |
| 2007                        | p4       | 6     | 111,666667 | 31,570028   |  |
| 2007                        | p5       | 6     | 98,333333  | 36,423436   |  |
| 2007                        | p6       | 6     | 117,5      | 39,717754   |  |

|          |       |   |            |             |  |
|----------|-------|---|------------|-------------|--|
| 2007     | p7    | 6 | 74,166667  | 41,523086   |  |
| 2007     | p8    | 6 | 69,166667  | 45,322915   |  |
| 2008     | p1    | 6 | 344,166667 | 91,837719   |  |
| 2008     | p2    | 6 | 146,333333 | 35,522763   |  |
| 2008     | p3    | 6 | 55,166667  | 14,593377   |  |
| 2008     | p4    | 6 | 28,383333  | 16,878438   |  |
| 2008     | p5    | 6 | 161        | 30,958036   |  |
| 2008     | p6    | 6 | 132,166667 | 53,458083   |  |
| 2008     | p7    | 6 | 85,833333  | 44,436096   |  |
| 2008     | p8    | 6 | 105        | 48,476799   |  |
| 2009     | p1    | 6 | 183,583333 | 128,755744  |  |
| 2009     | p2    | 6 | 136,916667 | 91,334778   |  |
| 2009     | p3    | 6 | 60,666667  | 44,301994   |  |
| 2009     | p4    | 6 | 27,5       | 29,790938   |  |
| 2009     | p5    | 6 | 11         | 24,027068   |  |
| 2009     | p6    | 6 | 33,833333  | 34,030379   |  |
| 2009     | p7    | 6 | 29,416667  | 18,467313   |  |
| 2009     | p8    | 6 | 14,416667  | 19,873139   |  |
| Level    | Level | N | Data16     |             |  |
| Cultivar | Care  |   | Mean       | Stand. Dev. |  |
| fianna   | p1    | 9 | 201,277778 | 94,268603   |  |
| fianna   | p2    | 9 | 134,166667 | 42,244822   |  |
| fianna   | p3    | 9 | 57         | 28,827071   |  |
| fianna   | p4    | 9 | 56,777778  | 56,001736   |  |
| fianna   | p5    | 9 | 79,666667  | 71,830095   |  |
| fianna   | p6    | 9 | 95,222222  | 75,999223   |  |
| fianna   | p7    | 9 | 43,222222  | 36,144771   |  |
| fianna   | p8    | 9 | 42,222222  | 35,79465    |  |
| irga     | p1    | 9 | 272,222222 | 135,187627  |  |



|       |          |       |            |            |             |
|-------|----------|-------|------------|------------|-------------|
| irga  | p2       | 9     | 151,333333 | 70,33669   |             |
| irga  | p3       | 9     | 96,333333  | 48,329598  |             |
| irga  | p4       | 9     | 54,922222  | 41,506077  |             |
| irga  | p5       | 9     | 100,555556 | 69,982339  |             |
| irga  | p6       | 9     | 93,777778  | 44,0448    |             |
| irga  | p7       | 9     | 83,055556  | 40,697393  |             |
| irga  | p8       | 9     | 83,5       | 62,301685  |             |
| Level | Level    | Level | N          | Data16     |             |
| Years | Cultivar | Care  |            | Mean       | Stand. Dev. |
| 2007  | fianna   | p1    | 3          | 171,666667 | 54,848276   |
| 2007  | fianna   | p2    | 3          | 158,333333 | 11,547005   |
| 2007  | fianna   | p3    | 3          | 88,333333  | 15,275252   |
| 2007  | fianna   | p4    | 3          | 123,333333 | 44,814432   |
| 2007  | fianna   | p5    | 3          | 80         | 30          |
| 2007  | fianna   | p6    | 3          | 123,333333 | 42,524503   |
| 2007  | fianna   | p7    | 3          | 40         | 20          |
| 2007  | fianna   | p8    | 3          | 36,666667  | 17,559423   |
| 2007  | irga     | p1    | 3          | 193,333333 | 46,457866   |
| 2007  | irga     | p2    | 3          | 131,666667 | 52,519838   |
| 2007  | irga     | p3    | 3          | 140        | 45,825757   |
| 2007  | irga     | p4    | 3          | 100        | 8,660254    |
| 2007  | irga     | p5    | 3          | 116,666667 | 37,527767   |
| 2007  | irga     | p6    | 3          | 111,666667 | 45,092498   |
| 2007  | irga     | p7    | 3          | 108,333333 | 20,207259   |
| 2007  | irga     | p8    | 3          | 101,666667 | 40,722639   |
| 2008  | fianna   | p1    | 3          | 281,666667 | 33,291641   |
| 2008  | fianna   | p2    | 3          | 145,333333 | 37,287174   |
| 2008  | fianna   | p3    | 3          | 56         | 15,099669   |
| 2008  | fianna   | p4    | 3          | 32         | 5,291503    |

|      |        |    |   |            |            |
|------|--------|----|---|------------|------------|
| 2008 | fianna | p5 | 3 | 157,666667 | 37,501111  |
| 2008 | fianna | p6 | 3 | 150        | 70         |
| 2008 | fianna | p7 | 3 | 72,666667  | 49,409851  |
| 2008 | fianna | p8 | 3 | 83,333333  | 15,275252  |
| 2008 | irga   | p1 | 3 | 406,666667 | 90,875373  |
| 2008 | irga   | p2 | 3 | 147,333333 | 41,968242  |
| 2008 | irga   | p3 | 3 | 54,333333  | 17,387735  |
| 2008 | irga   | p4 | 3 | 24,766667  | 25,396128  |
| 2008 | irga   | p5 | 3 | 164,333333 | 30,92464   |
| 2008 | irga   | p6 | 3 | 114,333333 | 35,92121   |
| 2008 | irga   | p7 | 3 | 99         | 44,440972  |
| 2008 | irga   | p8 | 3 | 126,666667 | 65,064071  |
| 2009 | fianna | p1 | 3 | 150,5      | 128,659434 |
| 2009 | fianna | p2 | 3 | 98,833333  | 51,759862  |
| 2009 | fianna | p3 | 3 | 26,666667  | 2,886751   |
| 2009 | fianna | p4 | 3 | 15         | 18,027756  |
| 2009 | fianna | p5 | 3 | 1,333333   | 1,258306   |
| 2009 | fianna | p6 | 3 | 12,333333  | 20,076935  |
| 2009 | fianna | p7 | 3 | 17         | 6,082763   |
| 2009 | fianna | p8 | 3 | 6,666667   | 10,275375  |
| 2009 | irga   | p1 | 3 | 216,666667 | 146,997732 |
| 2009 | irga   | p2 | 3 | 175        | 117,57976  |
| 2009 | irga   | p3 | 3 | 94,666667  | 37,819748  |
| 2009 | irga   | p4 | 3 | 40         | 37,749172  |
| 2009 | irga   | p5 | 3 | 20,666667  | 34,078341  |
| 2009 | irga   | p6 | 3 | 55,333333  | 33,246554  |
| 2009 | irga   | p7 | 3 | 41,833333  | 18,790512  |
| 2009 | irga   | p8 | 3 | 22,166667  | 26,487418  |
